# 1 **Comparison of long-read sequencing technologies in** 2 **the hybrid assembly of complex bacterial genomes**

3

4 Nicola De Maio<sup>1\*</sup>, Liam P. Shaw<sup>1\*</sup>, Alasdair Hubbard<sup>2</sup>, Sophie George<sup>1,3</sup>, Nick Sanderson<sup>1</sup>,  
5 Jeremy Swann<sup>1</sup>, Ryan Wick<sup>4</sup>, Manal AbuOun<sup>5</sup>, Emma Stubberfield<sup>5</sup>, Sarah J. Hoosdally<sup>1</sup>,  
6 Derrick W. Crook<sup>1,3</sup>, Timothy E. A. Peto<sup>1,3</sup>, Anna E. Sheppard<sup>1,3</sup>, Mark J. Bailey<sup>6</sup>, Daniel S.  
7 Read<sup>6</sup>, Muna F. Anjum<sup>5</sup>, A. Sarah Walker<sup>1,3</sup>, Nicole Stoesser<sup>1</sup> on behalf of the REHAB  
8 consortium

9

10 1: Nuffield Department of Medicine, University of Oxford, Oxford, UK.

11 2: Department of Tropical Disease Biology, Liverpool School of Tropical Medicine,  
12 Liverpool, L3 5QA, UK.

13 3: HPRU IHR Health Protection Research Unit in Healthcare Associated Infections and  
14 Antimicrobial Resistance at University of Oxford in partnership with Public Health England,  
15 Oxford, UK.

16 4: Department of Biochemistry and Molecular Biology, Bio21 Molecular Science  
17 and Biotechnology Institute, University of Melbourne, Australia.

18 5: Department of Bacteriology, Animal and Plant Health Agency, Addlestone, Surrey, KT15  
19 3NB, UK.

20 6: Centre for Ecology & Hydrology, Benson Lane, Crowmarsh Gifford, Wallingford, OX10  
21 8BB, UK.

22

23 \* These authors contributed equally.

24

25 Corresponding authors: Nicole Stoesser, [nicole.stoesser@ndm.ox.ac.uk](mailto:nicole.stoesser@ndm.ox.ac.uk)

## 26 ABSTRACT

27 Illumina sequencing allows rapid, cheap and accurate whole genome bacterial analyses, but  
28 short reads (<300 bp) do not usually enable complete genome assembly. Long read  
29 sequencing greatly assists with resolving complex bacterial genomes, particularly when  
30 combined with short-read Illumina data (hybrid assembly). However, it is not clear how  
31 different long-read sequencing methods impact on assembly accuracy. Relative automation of  
32 the assembly process is also crucial to facilitating high-throughput complete bacterial genome  
33 reconstruction, avoiding multiple bespoke filtering and data manipulation steps. In this study,  
34 we compared hybrid assemblies for 20 bacterial isolates, including two reference strains,  
35 using Illumina sequencing and long reads from either Oxford Nanopore Technologies (ONT)  
36 or from SMRT Pacific Biosciences (PacBio) sequencing platforms. We chose isolates from  
37 the Enterobacteriaceae family, as these frequently have highly plastic, repetitive genetic  
38 structures and complete genome reconstruction for these species is relevant for a precise  
39 understanding of the epidemiology of antimicrobial resistance. We *de novo* assembled  
40 genomes using the hybrid assembler Unicycler and compared different read processing  
41 strategies. Both strategies facilitate high-quality genome reconstruction. Combining ONT and  
42 Illumina reads fully resolved most genomes without additional manual steps, and at a lower  
43 consumables cost per isolate in our setting. Automated hybrid assembly is a powerful tool for  
44 complete and accurate bacterial genome assembly.

45

---

## 46 IMPACT STATEMENT

47 Illumina short-read sequencing is frequently used for tasks in bacterial genomics, such as  
48 assessing which species are present within samples, checking if specific genes of interest are  
49 present within individual isolates, and reconstructing the evolutionary relationships between  
50 strains. However, while short-read sequencing can reveal significant detail about the genomic  
51 *content* of bacterial isolates, it is often insufficient for assessing genomic *structure*: how  
52 different genes are arranged within genomes, and particularly which genes are on plasmids –  
53 potentially highly mobile components of the genome frequently carrying antimicrobial  
54 resistance elements. This is because Illumina short reads are typically too short to span  
55 repetitive structures in the genome, making it impossible to accurately reconstruct these  
56 repetitive regions. One solution is to complement Illumina short reads with long reads  
57 generated with SMRT Pacific Biosciences (PacBio) or Oxford Nanopore Technologies  
58 (ONT) sequencing platforms. Using this approach, called ‘hybrid assembly’, we show that  
59 we can automatically fully reconstruct complex bacterial genomes of Enterobacteriaceae  
60 isolates in the majority of cases (best-performing method: 17/20 isolates). In particular, by  
61 comparing different methods we find that using the assembler Unicycler with Illumina and  
62 ONT reads represents a low-cost, high-quality approach for reconstructing bacterial genomes  
63 using publicly available software.

64

---

## 65 DATA SUMMARY

66 Raw sequencing data and assemblies have been deposited in NCBI under BioProject  
67 Accession PRJNA422511 (<https://www.ncbi.nlm.nih.gov/bioproject/PRJNA422511>). We  
68 confirm all supporting data, code and protocols have been provided within the article or  
69 through supplementary data files.

## 70 INTRODUCTION

71 The rapid development of microbial genome sequencing methods over the last decade has  
72 revolutionized infectious disease epidemiology, and whole genome sequencing has become  
73 the standard for many molecular typing applications in research and public health (1–4).  
74 Much of this evolution has been driven by the development of high-throughput, low-cost,  
75 second generation (short-read) sequencing methods, such as Illumina’s HiSeq and MiSeq  
76 platforms, which produce millions of low-error (0.1%) paired-end reads, generally 100-300bp  
77 in length. As such, Illumina sequencing has become the most widely used sequencing  
78 technology for microbial genomics. Multiple read processing algorithms now exist, typically  
79 enabling variant detection following mapping to a reference genome to assess genetic  
80 relatedness (e.g. for outbreak investigation or population genetic studies), or *de novo*  
81 assembly to facilitate the identification of important loci in the accessory genome, such as  
82 antimicrobial resistance genes (e.g. for epidemiological studies of resistance gene prevalence  
83 or for susceptibility prediction).

84  
85 However, it has become clear that short-read sequencing has significant limitations  
86 depending on the bacterial species and/or epidemiological question. These limitations largely  
87 arise from the inability to fully reconstruct genomic structures of interest from short reads,  
88 including those on chromosomes and mobile genetic elements such as plasmids (5). An  
89 example where this genomic structure is highly relevant is the study of antimicrobial  
90 resistance (AMR) gene transmission and evolution in species of Enterobacteriaceae, which  
91 have emerged as a major clinical problem in the last decade (6). Short-read data from these  
92 species do not successfully facilitate assembly of the repetitive structures that extend beyond  
93 the maximum read length generated, including structures such as resistance gene cassettes,  
94 insertion sequences and transposons that are of crucial biological relevance to understanding  
95 the dissemination of key antimicrobial resistance genes.

96  
97 The most widely used single molecule, long-read sequencing platforms, currently represented  
98 by Pacific Biosciences’ (PacBio) Single Molecule Real-Time (SMRT) and Oxford Nanopore  
99 Technologies’ (ONT) MinION sequencers, are often able to overcome these limitations by  
100 generating reads with a median length of 8-10kb, and as long as 100kb (5,7,8). However, the  
101 sequencing error rates of both long-read methods are much greater than Illumina (PacBio: 11-  
102 15%, raw, less in circular consensus reads (9); ONT: 5-40% (10)). Hybrid assembly, using  
103 combined short-read and long-read sequencing datasets, has emerged as a promising  
104 approach to generating fully resolved, accurate genome assemblies. With hybrid approaches,  
105 long reads provide information regarding the structure of the genome, specifically in  
106 plasmids, and short reads facilitate detailed assembly at local scales, and can be used to  
107 correct errors in long reads (11–13). The hybrid assembly tool Unicycler has been shown to  
108 outperform other hybrid assemblers in generating fully closed genomes (12).

109  
110 We are not aware of any previously published direct comparisons of hybrid bacterial  
111 assemblies generated using long-read sequencing methods, yet the selection of a long-read  
112 sequencing approach has important cost, throughput and logistical implications. Currently,  
113 the two dominant long-read technologies are ONT and PacBio. The ONT MinION is a highly  
114 portable platform that has been deployed in several molecular laboratories, including those in  
115 low-income settings (14). Reported data yields of 10-30Gb and indexed barcoding now  
116 enable multiplexing of up to 12 bacterial isolates on a run (13). In contrast, the PacBio  
117 platform is non-portable but has been around longer, making it the most widely used for  
118 generating reference-grade bacterial assemblies to date (by way of example: as of 21<sup>st</sup>

119 January 2019, NCBI Assembly contains 201 *E. coli* assemblies generated with PacBio vs. 3  
120 generated with MinION).

121

122 Here we compared different approaches for hybrid bacterial genome assembly, using ONT  
123 MinION, PacBio and Illumina HiSeq data generated from the same DNA extracts. We  
124 selected 20 bacterial isolates from four genera of the Enterobacteriaceae family of bacteria  
125 (*Escherichia*, *Klebsiella*, *Citrobacter* and *Enterobacter*) including two reference strains.  
126 These genera typically have large bacterial genomes between 5-6.5Mb with diverse sets of  
127 plasmids (15). We compared the advantages and disadvantages of ONT+Illumina versus  
128 PacBio+Illumina hybrid assembly, including the need for additional manual processing steps.  
129 We also investigated different strategies to optimize hybrid assembly using Unicycler for  
130 both long-read approaches.

131

## 132 **METHODS**

### 133 **Bacterial isolates, DNA extraction and Illumina sequencing**

134 For sequencing, we selected and sub-cultured 20 isolates across the four genera of interest  
135 from stocks of pure culture, stored in nutrient broth with 10% glycerol at -80°C. Sub-  
136 cultures were undertaken aerobically on Columbia blood agar at 37°C overnight. We chose  
137 two reference strains, *Escherichia coli* CFT073, and *Klebsiella pneumoniae* MGH78578, and  
138 18 isolates that were part of a study investigating antimicrobial resistance in diverse  
139 Enterobacteriaceae from farm animals and environmental specimens (the REHAB study  
140 <http://modmedmicro.nsms.ox.ac.uk/rehab>; details of isolates in Table S1). These comprised *E. coli*  
141 (n=4), *K. pneumoniae* (n=2), *K. oxytoca* (n=2), *Citrobacter freundii* (n=2), *C. braakii* (n=2),  
142 *C. gillenii* (n=1), *Enterobacter cloacae* (n=3), *E. kobei* (n=2). We chose to investigate  
143 Enterobacteriaceae isolates as these bacteria are genetically complex: their genomes  
144 commonly contain multiple plasmids and repeat structures of varying size, making them  
145 difficult to assemble using other methods (5).

146

147 DNA was extracted from sub-cultured isolates using the Qiagen Genomic tip 100/G kit  
148 (Qiagen, Valencia, CA, USA) to facilitate long-fragment extraction. Quality and fragment  
149 length distributions were assessed using the Qubit fluorometer (ThermoFisher Scientific,  
150 Waltham, MA, USA) and TapeStation (Agilent, Santa Clara, CA, USA).

151

152 All DNA extracts were sequenced using the Illumina HiSeq 4000, generating 150bp paired-  
153 end reads. Libraries were constructed using the NEBNext Ultra DNA Sample Prep Master  
154 Mix Kit (NEB, Ipswich, MA, USA) with minor modifications and a custom automated  
155 protocol on a Biomek FX (Beckman Coulter, Brea, CA, USA). Ligation of adapters was  
156 performed using Illumina Multiplex Adapters, and ligated libraries were size-selected using  
157 Agencourt Ampure magnetic beads (Beckman Coulter, Brea, CA, USA). Each library was  
158 PCR-enriched with custom primers (index primer plus dual index PCR primer (16)).  
159 Enrichment and adapter extension of each preparation was obtained using 9µl of size-selected  
160 library in a 50µl PCR reaction. Reactions were then purified with Agencourt Ampure XP  
161 beads (Beckman Coulter, Brea, CA, USA) on a Biomek NXp after 10 cycles of amplification  
162 (as per Illumina recommendations). Final size distributions of libraries were determined using  
163 a TapeStation system as above and quantified by Qubit fluorometry.

164

### 165 **ONT library preparation and sequencing**

166 ONT sequencing libraries were prepared by multiplexing DNA extracts from four isolates per  
167 flowcell using the SQK-LSK108 and EXP-NBD103 kits according to the manufacturer's  
168 protocol with the following amendments: input DNA (1.5µg) was not fragmented, 2ml  
169 Eppendorf DNA LoBind tubes (Eppendorf, Hamburg, Germany) were used, all reactions  
170 were purified using 0.4x Agencourt AMPure XP beads, incubation time with Agencourt  
171 AMPure XP beads was doubled, elution volumes were reduced to the minimum required for  
172 the subsequent step, and elution was heated to 37°C. Libraries were loaded onto flow cell  
173 versions FLO-MIN106 R9.4 SpotON and sequenced for 48 hours.

174

## 175 **PacBio library preparation and sequencing**

176 DNA extracts were initially sheared to an average length of 15kb using g-tubes, as specified  
177 by the manufacturer (Covaris, Woburn, MA, USA). Sheared DNA was used in SMRTbell  
178 library preparation, as recommended by the manufacturer. Quantity and quality of the  
179 SMRTbell libraries were evaluated using the High Sensitivity dsDNA kit and Qubit  
180 fluorometer and DNA 12000 kit on the 2100 Bioanalyzer (Agilent, Santa Clara, CA, USA).  
181 To obtain the longest possible SMRTbell libraries for sequencing (as recommended by the  
182 manufacturer), a further size selection step was performed using the PippinHT pulsed-field  
183 gel electrophoresis system (Sage Science, Beverley, MA, USA), enriching for the SMRTbell  
184 libraries >15kb for loading onto the instrument. Sequencing primer and P6 polymerase were  
185 annealed and bound to the SMRTbell libraries, and each library was sequenced using a single  
186 SMRT cell on the PacBio RSII sequencing system with 240-minute movies.

187

## 188 **Read preparation and hybrid assembly**

189 ONT fast5 read files were base-called with Albacore (v2.0.2, [https://github.com/JGI-](https://github.com/JGI-Bioinformatics/albacore)  
190 [Bioinformatics/albacore](https://github.com/JGI-Bioinformatics/albacore)), with barcode demultiplexing and fastq output. Adapter sequences were  
191 trimmed with Porechop (v0.2.2, <https://github.com/rrwick/Porechop>). Read quality was calculated  
192 with nanostat (v0.22, <https://github.com/wdecoster/nanostat>) (17).

193

194 Long reads from both ONT and PacBio were prepared using four alternative strategies:

195 • **Basic:** no filtering or correction of reads (i.e. all long reads available used for  
196 assembly).

197 • **Corrected:** Long reads were error-corrected and subsampled (preferentially selecting  
198 longest reads) to 30-40x coverage using Canu (v1.5, <https://github.com/marbl/canu>) (7)  
199 with default options.

200 • **Filtered:** long reads were filtered using Filtlong (v0.1.1, <https://github.com/rrwick/Filtlong>)  
201 by using Illumina reads as an external reference for read quality and either removing  
202 10% of the worst reads or by retaining 500Mbp in total, whichever resulted in fewer  
203 reads. We also removed reads shorter than 1kb and used the --trim and --split 250  
204 options.

205 • **Subsampled:** we randomly subsampled long reads to leave approximately 600Mbp  
206 (corresponding to a long read coverage around 100x).

207 Hybrid assembly for each of the two long-read sequencing technologies and for each of the  
208 four read processing strategies (for a total of 8 hybrid assemblies per isolate) was performed  
209 using Unicycler (v0.4.0) (12) with default options.

210

211 We used Bandage (v0.8.1) (18) to visualize assemblies, and the Interactive Genome Viewer  
212 (IGV, v2.4.3) (19) to visualize discrepancies in assemblies produced by the different  
213 methods.

214

215 To simulate the effect of additional multiplexing on ONT data and assembly (with current  
216 kits allowing for up to 12 isolates to be indexed), we randomly subsampled half or one third  
217 of the ONT reads from each isolate and repeated the assembly as in the “Basic” strategy  
218 above.

219

## 220 **Assembly comparison**

221 We used multiple strategies to compare the features of different hybrid assemblies of the  
222 same DNA extract. Firstly, we considered the completeness of an assembly i.e. specifically  
223 whether all contigs reconstructed by Unicycler were identified as circular structures. Circular  
224 structures typically represent completely assembled bacterial chromosomes and plasmids;  
225 circular structures from different assemblies in our 20 isolates tended to agree in the majority  
226 of cases (Table 1) and agreed with the structures of reference genomes for the two reference  
227 strains (CFT073 and MH78578). We therefore also used the number of circular contigs in an  
228 assembly as a measure of its completeness.

229

230 A common error associated with long-read-based assemblies is indel errors, which can  
231 artificially shorten proteins by introducing premature stop codons or frameshift errors (20).  
232 To check this possibility we annotated genomes with Prokka (v1.13.3,  
233 <https://github.com/tseemann/prokka>) (21) then aligned all proteins to the full UniProt TrEMBL  
234 database (November 15<sup>th</sup> 2018) using DIAMOND (v0.9.22, <https://github.com/bbuchfink/diamond>)  
235 (22) and compared the length of each protein to its top hit. We compared proteins in  
236 assemblies for the same sample with Roary (v3.12.0, <https://sanger-pathogens.github.io/Roary>) (23).

237

238 We additionally compared different assemblies of the same extract using:

239

240 • ALE (24), which assesses the quality of different assemblies using a likelihood-based  
241 score of how well Illumina reads map to each assembly. ALE was run with default  
242 parameters; Illumina reads were mapped to references using Bowtie2 (v2.3.3) (25).

242

243 • DNAdiff (as part of MUMMER v3.23) (26), which compares assemblies of the same  
244 strain to detect differences such as SNPs and indels. DNAdiff was run with default  
245 parameters on the fasta assembly files.

245

246 • REAPR (v1.0.18) (27), which (similarly to ALE) evaluates the accuracy of assemblies  
247 using information from short read mapping to the assembly. REAPR was run using  
248 the options “fcheck”, “smaltmap” and “pipeline” with default parameters.

248

249 • Minimap2 (v2017-09-21) (28) was used to map long reads to the hybrid assemblies,  
250 and the mappings were evaluated to compare assembly quality and long read features  
251 (identity and length) using scripts from the Filtlong package. We considered the  
252 average identity for each base, and if there were multiple alignments at a base, we  
253 used the one with the best score. We aligned PacBio and ONT reads to the hybrid  
254 assemblies obtained either from all PacBio reads or from all ONT reads. Read  
255 alignments were classified as: “good” if they had at least one alignment covering 97%  
256 of the read, as a putative “chimera” if they had multiple inconsistent alignments  
257 represented by at least 10% of the read length and  $\geq 70\%$  nucleotide identity, and  
258 “other” if they did not fall into either of the two previous categories.

258

## 259 **RESULTS**

### 260 **Sequencing data quality**

261 For Illumina data, a median of 2,457,945 (interquartile range [IQR]: 2,073,342-2,662,727)  
262 paired reads was generated for each isolate, with a median insert size of 363 bp (351-369).

263 The %GC content per isolate varied, as expected, by genus (median 53%, range: 50-57%),  
264 but was consistent with the expected %GC content for each isolate based on its species  
265 (Table S1).

266  
267 The PacBio SMRT sequencing data resulted in a median of 160,740 (IQR: 153,196-169,240)  
268 sub-reads with median sub-read length of 11,050 bp (IQR: 10,570-11,209 bp) per isolate.  
269 Each isolate was sequenced using one SMRT cell on the RSII sequencing system, generating  
270 a median of 1.32Gb (IQR: 1.25-1.36) of data per isolate, with isolates being run in batches of  
271 8 (Figure S1, Table S1). For the ONT data, a median of 102,875 reads (IQR: 70,508-143,745  
272 reads) were generated for each isolate, with a median phred score of 11.8 (IQR: 11.4-12.3).  
273 ONT reads had a median length of 14,212 bp (IQR: 13,369-16,267 bp). A median of 13.8Gb  
274 (IQR: 10.8-14.7Gb) of data was generated per run, resulting in a median of 3.45Gb per  
275 isolate (four isolates multiplexed per run) (Figure S1, Table S1). After hybrid assembly, the  
276 mean percentage identity and identity N50 for reads aligned against their respective  
277 assemblies were higher for ONT reads than PacBio reads (mean±s.d. read alignment identity:  
278 86±7 vs. 78±17; Figure S3, Table S3).

279

### 280 **Hybrid assembly runtimes**

281 Clearly the computing infrastructure available to any given research team will be widely  
282 variable, and assembly runtimes will therefore be different. For this experiment, where all  
283 assemblies were run with dual 8-core Intel IvyBridge 2.6GHz, 256GB 1866MHz memory,  
284 assembly times averaged between 1600-8000 minutes (~26-130 hours, Table S4), depending  
285 on long-read preparation strategy (i.e. basic, corrected, filtered, sub-sampled, as in Methods).  
286 They did not significantly vary depending on type of long-read used as input. Assemblies  
287 completed in all cases, apart from two cases (both ONT+Illumina hybrids: MGH78578  
288 reference strain, filtered strategy; RBHSTW-00123, corrected strategy).

289

### 290 **PacBio vs. ONT-based hybrid assembly comparisons**

291 Using ONT+Illumina hybrid assembly approaches, we were able to completely assemble (i.e.  
292 all contigs circularised) the majority of genomes (between 12 [60%] and 17 [85%] depending  
293 on the preparation strategy for long reads, Table 1) without any manual intervention (18  
294 across all strategies). With PacBio+Illumina fewer assemblies were complete (between 7  
295 [35%] and 9 [45%]). More contigs were also circularised with ONT than with PacBio (up to  
296 84 [97%] versus 67 [77%]), and assemblies were less fragmented (a minimum of 102 total  
297 contigs across all 20 isolates for ONT vs. a minimum of 218 for PacBio).

298

299 On the basis of the minimap2/Filtlong comparisons (see Methods), most reads from both  
300 long-read platforms had “good” alignment to their respective assemblies (~103,000 reads on  
301 average for PacBio vs. ~99,000 reads for ONT, Figure S2, Table S2), with slightly more  
302 alignments classified as “chimeras” (4,502 vs. 1,074 reads) and a much larger number of  
303 alignments that were poor and classified as “other” (54,449 vs. 8,222) for PacBio compared  
304 to ONT reads (Figure S2, Table S2).

305

306 Some chromosomal regions proved hard to assemble with both PacBio and ONT, e.g. for  
307 isolates RBHSTW-00029 and RHB14-C01, but one of the noticeable differences between the  
308 two methods was the ability of ONT to resolve repeats on small plasmids (see Figure 1 and  
309 Figure S4). The DNA fragment size selection process used to optimize PacBio sequencing  
310 and recommended by the manufacturer may have contributed to this (see Methods),  
311 essentially making the assembly of small plasmids reliant on the Illumina short-read

312 component of the dataset only. This also reduces the power of PacBio reads for resolving the  
313 genome structure when one copy of a repeated region is present on a short plasmid.

314  
315 While correcting ONT reads with Canu or filtering them with Filtlong improved assembly  
316 completeness for one isolate (RBHSTW-00309), in most cases avoiding this ONT read  
317 correction and filtration led to better results (Table 1). This might be due to correction and  
318 filtration steps removing reads in a non-uniform way across the genome, and in particular  
319 from regions that are already hard to assemble. An alternative strategy deployed to reduce the  
320 computational burden of hybrid assembly was to randomly sub-sample long reads until a  
321 certain expected coverage was reached. Table 1 shows that this strategy was preferable to  
322 read correction and filtration: it did not reduce assembly completeness but did reduce  
323 computational demand (from an average of 5640 minutes to 2020 minutes per assembly on a  
324 dual 8-core Intel IvyBridge 2.6GHz, 256GB 1866MHz memory, Table S4).

325  
326 The analysis of local sequence assembly quality was inconclusive, showing inconsistent  
327 results across different methodologies (Table 2), suggesting neither approach was clearly  
328 superior to the other in this respect. However, detailed investigation of single nucleotide  
329 polymorphisms (SNPs) between ONT and PacBio-based assemblies for the reference isolates  
330 demonstrated two specific patterns of assembly differences. First, some positions (17 SNPs  
331 across the two reference isolates) appeared plausibly polymorphic in the original DNA  
332 sample and were called differently in different assembly runs (see Figure 2a). Secondly,  
333 positions within regions with extremely low Illumina coverage (see Figure 2b) could have led  
334 to assembly errors (25 SNPs across the two reference isolates), the PacBio assemblies being  
335 more affected (22 cases vs 3 for ONT).

336  
337 The proportion of proteins with a length of <90% of their top UniProt hit was low (~2-4% c.f.  
338 3.7% for the RefSeq assembly of *E. coli* MG1655) and extremely consistent across  
339 ONT+Illumina and PacBio+Illumina assemblies (Figure S5), suggesting that indels were not  
340 a significant problem in the assemblies. There was very close agreement between methods  
341 (median discrepancy < 5 proteins), although there were a greater number of cases where more  
342 proteins were found in the ONT+Illumina assemblies (Figure S6). Proteins found uniquely in  
343 an assembly tended to be found on a contig that was fragmented in the comparison assembly  
344 (e.g. the third plasmid in the ONT-based assembly for RBHSTW-00167 was fragmented in  
345 the comparison PacBio-based assembly, and was the location of 11 proteins unique to the  
346 ONT-based assembly), highlighting that the degree of contig fragmentation in an assembly  
347 can affect conclusions about gene presence beyond just the inability to resolve genomic  
348 structures (Table S5, Figure S4).

349  
350 Comparing *de novo* assemblies and reference genomes for the two reference strains (CFT073  
351 and MGH78578) we found that the hybrid assemblies from ONT and PacBio reads were  
352 more similar to each other (e.g. 18 SNPs and 0 indels for CFT073 and 24 SNPs and 13 indels  
353 for MGH78578) than to the available reference genome sequences (156-365 SNPs and 47-  
354 439 indels vs. the references, Table S6), possibly due to: (i) strain evolution in storage and  
355 sub-culture since the reference strains were sequenced; (ii) errors in the original reference  
356 sequences; and/or (iii) consistent errors in the hybrid assemblies.

357  
358 Lastly, we investigated the effects of further ONT multiplexing by simulating datasets with 8  
359 and 12 barcodes respectively (see Methods). Halving the available reads (equivalent to 8  
360 barcodes) had no negative effect on the assemblies (Table S7). Using a third (equivalent to 12  
361 barcodes) slightly increased the fragmentation of the assemblies overall (one fewer



362 completed assembly and nine additional non-circular contigs). However, these results were  
363 not uniform: two assemblies gained an extra circular contig (RBHSTW-00309 and  
364 RBHSTW-00340) with this downsampling.

365

### 366 **DNA preparation and sequencing costs**

367 Beyond considerations of assembly accuracy, an important and realistic consideration when  
368 choosing a sequencing approach is cost. While we do not attempt to calculate estimates that  
369 will apply across different labs and settings, we can report our consumables costs per isolate  
370 (i.e. exclusive of other potential costs, such as labour/infrastructure [laboratory and  
371 computational]) in case it is helpful for informing others. The cost of bacterial culture and  
372 DNA extraction was approximately £12 per isolate, resulting in sufficient DNA for all three  
373 sequencing methods to be performed in parallel on a single extract. Cost for Illumina library  
374 preparation and sequencing (see Methods) was ~£41 per isolate. ONT MinION sequencing  
375 (library preparation and run) was performed by multiplexing 4 isolates per run, resulting in  
376 costs of approximately £130 per isolate; however, it is possible to multiplex up to 12 isolates  
377 per run at correspondingly lower coverage (13), resulting in costs of ~£44/isolate. At the time  
378 we performed these experiments (late 2017), the PacBio sequencing was done using one  
379 isolate per library per SMRTcell on the RSII system, with PacBio sequencing costs of more  
380 than £280 per isolate. However, at the time of manuscript preparation, microbial sequencing  
381 had been transferred to the higher throughput PacBio Sequel system, on which multiple  
382 isolates can be multiplexed per SMRTcell 1M. Assuming ownership of a Sequel system, the  
383 updated cost for PacBio sequencing, including DNA fragmentation, SMRTbell preparation,  
384 size selection on the BluePippin system (Sage Science) and sequencing, is £190 per isolate  
385 when multiplexing 8 isolates. If less coverage is needed or smaller genomes are to be  
386 examined, one could multiplex up to 16 isolates per SMRTcell 1M at a cost of £152 per  
387 isolate.

388

389 To summarise, in the optimal scenario for each technology in our setting, our total predicted  
390 consumables costs range from £97-183 for generating an ONT+Illumina hybrid assembly  
391 (multiplexing 4 versus 12 isolates) to £205-255 for generating a PacBio+Illumina hybrid  
392 assembly on the PacBio Sequel system (multiplexing 8 versus 16 isolates). Costs using the  
393 PacBio RSII system (i.e. >£320) to generate PacBio+Illumina hybrid assemblies would be  
394 substantially higher than those for generating an ONT+Illumina hybrid assembly. We stress  
395 that these costs are estimates only, and specifically do not include infrastructural and staffing  
396 costs.

397

---

## 398 **DISCUSSION**

399 Combining short read Illumina sequencing with different long read sequencing technologies  
400 and using Unicycler, a publicly available and widely-used hybrid assembly tool, we found  
401 that ONT+Illumina hybrid assembly generally facilitates the complete assembly of complex  
402 bacterial genomes without additional manual steps. Our data thus support ONT+Illumina  
403 sequencing as a non-inferior bacterial genome hybrid assembly approach compared with  
404 PacBio+Illumina, leading to more complete assemblies, and to significantly lower costs per  
405 isolate if multiplexed.

406

407 We also investigated the impact of different long-read processing strategies on assembly  
408 quality and found that different strategies can result in more complete assemblies. We  
409 showed that quality-based filtration and correction of long reads can apparently paradoxically  
410 result in worse performance than just using unfiltered and uncorrected reads. There is no

411 obvious explanation for this; although we speculate that preferential removal of long reads  
412 from hard-to-sequence regions might be a contributing factor, we have been unable to  
413 establish if this is the case. We propose a different strategy to reduce the computational  
414 burden of hybrid assembly without affecting the final outcome, namely randomly sub-  
415 sampling long reads down to a desired level of coverage. We demonstrated that this strategy  
416 generally results in better assemblies for ONT sequencing data.

417  
418 We did however identify some recurrent patterns of local hybrid misassembly that could be  
419 systematically addressed in the future. One of these is the presence of polymorphisms in the  
420 DNA extract. These may represent genuine minor variants present in the isolate (although it  
421 is difficult to establish with certainty), but the salient fact here is that current bacterial  
422 assembly methods assume that no position is polymorphic which can lead to an imperfect  
423 representation of the genomic content where this is not the case. We advocate for the  
424 inclusion or awareness of polymorphisms within assembly polishing methods e.g. Pilon (29).

425  
426 The other problem we identified is that regions with very low Illumina coverage tend to be  
427 enriched with small assembly errors. This problem could similarly be addressed in the future  
428 with hybrid assembly polishing methods, which would supplement Illumina-based polishing  
429 with long read-based polishing in regions with low Illumina coverage.

430  
431 There were several limitations to our study. Firstly, we included only two reference strains,  
432 and our analyses suggest that the “true” sequences for these had diverged from the publicly  
433 available reference sequences. This divergence could arise from multiple sources: true  
434 biological variation after years of storage and/or sub-culture (a known possibility that has  
435 been previously observed for bacterial reference strains e.g. in archived cultures of  
436 *Salmonella enterica* serovar Typhimurium LT2 (30)), errors in the original reference  
437 sequences (first published in 2002 for CFT073, 2007 for MGH78578), or possible errors in  
438 our hybrid assemblies. Thus, making comparisons for any given approach even in the case  
439 where a reference is available is difficult in the absence of a clear gold standard. Of note, we  
440 tried to minimize biological variability introduced in culture by sequencing the same DNA  
441 extract across different platforms. For 18 isolates the “true” underlying sequence was  
442 unknown, which is common for highly plastic Enterobacteriaceae genomes. There is no  
443 consensus on how best to evaluate assemblies and assembly quality when a reference is not  
444 available. We therefore used several approaches, and these were not always consistent with  
445 each other.

446  
447 Assemblies can sometimes be further improved after an initial evaluation using “manual  
448 completion” (see <https://github.com/rrwick/Unicycler/wiki/Tips-for-finishing-genomes>).  
449 However, we did not investigate manual completion for our hybrid assemblies because, in  
450 general, it is hard to replicate, has not been benchmarked and validated, is more easily biased,  
451 and is not feasible for processing large numbers of isolates. We did not identify any  
452 published, publicly available tools developed to specifically handle PacBio+Illumina hybrid  
453 assembly, although some research groups may have implemented and validated these in-  
454 house. Finally, we did not investigate the effect of different basecallers. The evolution of both  
455 technologies and post-sequencing processing of data generated by both ONT and PacBio  
456 platforms is rapid, and recent advances have been made e.g. in basecalling with the switch  
457 from Albacore to Guppy for ONT data. Our assumption is that such advances which improve  
458 read quality and basecalling will improve assembly quality, but we have not carried out  
459 specific comparisons.

460

461 In conclusion, we have demonstrated that reference-grade, complete hybrid assemblies can be  
462 effectively generated for complex bacterial genomes including multiple plasmids using ONT  
463 platforms in combination with Illumina data. Given the average yields that can be generated  
464 with these devices, it should be feasible to comfortably multiplex eight Enterobacteriaceae  
465 isolates per ONT flowcell. At current listed cost prices, this effectively represents a cost of  
466 ~£100/hybrid assembly (all laboratory and sequencing consumables costs [includes Illumina  
467 and Nanopore]).

---

## 470 **AUTHOR STATEMENTS**

### 471 472 **Authors and contributors**

473 Conceptualisation: NdM, ASW, TEAP, DWC, NSt; Methodology: NdM, LPS, RW, NSt;  
474 Software: NdM, LPS, RW, AS, NSa, JS; Formal analysis: NdM, LPS, NSt; Investigation:  
475 AH, SG, MAb, ES; Resources: MA, DR, DWC, ASW, TEAP, SJH, NSt; Data curation:  
476 MAb, ES, NdM, LPS, NSt; Writing - original draft preparation: NdM, LPS, SG, ASW, NSt;  
477 Writing - review and editing: All authors; Visualisation: NdM, LPS, NSt; Supervision: MA,  
478 DR, DWC, NSt; Project administration: SJH, MA, DR, NSt; Funding: MA, DR, DWC, NSt.

### 479 480 **Conflicts of interest**

481 The authors have no conflicts of interest to declare.

### 482 483 **Funding information**

484 This work was funded by the Antimicrobial Resistance Cross-council Initiative supported by  
485 the seven research councils [NE/N019989/1].

486  
487 Crook, George, Peto, Sheppard, Walker are affiliated to the National Institute for Health  
488 Research Health Protection Research Unit (NIHR HPRU) in Healthcare Associated  
489 Infections and Antimicrobial Resistance at University of Oxford in partnership with Public  
490 Health England (PHE) [grant HPRU-2012-10041]. The views expressed are those of the  
491 author(s) and not necessarily those of the NHS, the NIHR, the Department of Health or  
492 Public Health England.

493  
494 This work is supported by the NIHR Oxford Biomedical Research Centre.

### 495 496 **Acknowledgements**

497 The REHAB consortium is represented by (bracketed individuals also included in main  
498 author list): (Abuoun M), (Anjum M), Bailey M, Brett H, Bowes M, Chau K, (Crook DW),  
499 (de Maio N), Duggett N, Gilson D, Gweon HS, (Hubbard A), (Hoosdally S), Kavanaugh J,  
500 Jones H, (Peto TEA), (Read DS), Sebra R, (Shaw LP), (Sheppard AE), Smith R,  
501 (Stubberfield E), (Swann J), (Walker AS), Woodford N.

502  
503 We would like to acknowledge the support of Sebra R and Smith M in the Department of  
504 Genetics and Genomic Sciences at the Icahn School of Medical Sciences at Mt Sinai (New  
505 York, USA), who participated in the experimental design of the study and performed the  
506 long-read PacBio sequencing.

507  
508 We would also like to acknowledge the support of Hartwell O and Platt J (Oxford Nanopore  
509 Technologies, Oxford, UK); however, there was no input from ONT in the design,  
510 experimental work, bioinformatics, or analyses performed in this study.

511

---

## 513 ABBREVIATIONS

514

515 ONT: Oxford Nanopore Technologies

516 PacBio: Pacific Biosciences

517 SNP: single nucleotide polymorphism

518 AMR: antimicrobial resistance

519

---

## 520 REFERENCES

521

522 1. Didelot X, Bowden R, Wilson DJ, Peto TEA, Crook DW. Transforming clinical  
523 microbiology with bacterial genome sequencing. *Nature Reviews. Genetics*. [Online]  
524 2012;13(9): 601–612. Available from: doi:10.1038/nrg3226

525 2. Bradley P, Gordon NC, Walker TM, Dunn L, Heys S, Huang B, et al. Rapid antibiotic-  
526 resistance predictions from genome sequence data for *Staphylococcus aureus* and  
527 *Mycobacterium tuberculosis*. *Nature Communications*. [Online] 2015;6: 10063.  
528 Available from: doi:10.1038/ncomms10063

529 3. Didelot X, Walker AS, Peto TE, Crook DW, Wilson DJ. Within-host evolution of  
530 bacterial pathogens. *Nature Reviews. Microbiology*. [Online] 2016;14(3): 150–162.  
531 Available from: doi:10.1038/nrmicro.2015.13

532 4. Qin J, Li R, Raes J, Arumugam M, Burgdorf KS, Manichanh C, et al. A human gut  
533 microbial gene catalogue established by metagenomic sequencing. *Nature*. [Online]  
534 2010;464(7285): 59–65. Available from: doi:10.1038/nature08821

535 5. George S, Pankhurst L, Hubbard A, Votintseva A, Stoesser N, Sheppard AE, et al.  
536 Resolving plasmid structures in Enterobacteriaceae using the MinION nanopore  
537 sequencer: assessment of MinION and MinION/Illumina hybrid data assembly  
538 approaches. *Microbial Genomics*. [Online] 2017;3(8): e000118. Available from:  
539 doi:10.1099/mgen.0.000118

540 6. Logan LK, Weinstein RA. The Epidemiology of Carbapenem-Resistant  
541 Enterobacteriaceae: The Impact and Evolution of a Global Menace. *The Journal of*  
542 *Infectious Diseases*. [Online] 2017;215(suppl\_1): S28–S36. Available from:  
543 doi:10.1093/infdis/jiw282

544 7. Koren S, Walenz BP, Berlin K, Miller JR, Bergman NH, Phillippy AM. Canu: scalable  
545 and accurate long-read assembly via adaptive k-mer weighting and repeat separation.  
546 *Genome Research*. [Online] 2017;27(5): 722–736. Available from:  
547 doi:10.1101/gr.215087.116

- 548 8. Loman NJ, Quick J, Simpson JT. A complete bacterial genome assembled de novo  
549 using only nanopore sequencing data. *Nature Methods*. [Online] 2015;12(8): 733–735.  
550 Available from: doi:10.1038/nmeth.3444
- 551 9. Rhoads A, Au KF. PacBio Sequencing and Its Applications. *Genomics, Proteomics &*  
552 *Bioinformatics*. [Online] 2015;13(5): 278–289. Available from:  
553 doi:10.1016/j.gpb.2015.08.002
- 554 10. Goodwin S, Gurtowski J, Ethe-Sayers S, Deshpande P, Schatz MC, McCombie WR.  
555 Oxford Nanopore sequencing, hybrid error correction, and de novo assembly of a  
556 eukaryotic genome. *Genome Research*. [Online] 2015;25(11): 1750–1756. Available  
557 from: doi:10.1101/gr.191395.115
- 558 11. Risse J, Thomson M, Patrick S, Blakely G, Koutsovoulos G, Blaxter M, et al. A single  
559 chromosome assembly of *Bacteroides fragilis* strain BE1 from Illumina and MinION  
560 nanopore sequencing data. *GigaScience*. [Online] 2015;4: 60. Available from:  
561 doi:10.1186/s13742-015-0101-6
- 562 12. Wick RR, Judd LM, Gorrie CL, Holt KE. Unicycler: Resolving bacterial genome  
563 assemblies from short and long sequencing reads. *PLoS computational biology*. [Online]  
564 2017;13(6): e1005595. Available from: doi:10.1371/journal.pcbi.1005595
- 565 13. Wick RR, Judd LM, Gorrie CL, Holt KE. Completing bacterial genome assemblies with  
566 multiplex MinION sequencing. *Microbial Genomics*. [Online] 2017;3(10): e000132.  
567 Available from: doi:10.1099/mgen.0.000132
- 568 14. Quick J, Loman NJ, Duraffour S, Simpson JT, Severi E, Cowley L, et al. Real-time,  
569 portable genome sequencing for Ebola surveillance. *Nature*. [Online] 2016;530(7589):  
570 228–232. Available from: doi:10.1038/nature16996
- 571 15. Carattoli A. Resistance plasmid families in Enterobacteriaceae. *Antimicrobial Agents*  
572 *and Chemotherapy*. [Online] 2009;53(6): 2227–2238. Available from:  
573 doi:10.1128/AAC.01707-08
- 574 16. Lamble S, Batty E, Attar M, Buck D, Bowden R, Lunter G, et al. Improved workflows  
575 for high throughput library preparation using the transposome-based Nextera system.  
576 *BMC biotechnology*. [Online] 2013;13: 104. Available from: doi:10.1186/1472-6750-  
577 13-104
- 578 17. De Coster W, D’Hert S, Schultz DT, Cruts M, Van Broeckhoven C. NanoPack:  
579 visualizing and processing long-read sequencing data. *Bioinformatics*. [Online]  
580 2018;34(15): 2666–2669. Available from: doi:10.1093/bioinformatics/bty149
- 581 18. Wick RR, Schultz MB, Zobel J, Holt KE. Bandage: interactive visualization of de novo  
582 genome assemblies. *Bioinformatics (Oxford, England)*. [Online] 2015;31(20): 3350–  
583 3352. Available from: doi:10.1093/bioinformatics/btv383
- 584 19. Thorvaldsdottir H, Robinson JT, Mesirov JP. Integrative Genomics Viewer (IGV): high-  
585 performance genomics data visualization and exploration. *Briefings in Bioinformatics*.  
586 [Online] 2013;14(2): 178–192. Available from: doi:10.1093/bib/bbs017

- 587 20. Watson M. A simple test for uncorrected insertions and deletions (indels) in bacterial  
588 genomes. 2018; Available from: [http://www.opiniomics.org/a-simple-test-for-](http://www.opiniomics.org/a-simple-test-for-uncorrected-insertions-and-deletions-indels-in-bacterial-genomes/)  
589 [uncorrected-insertions-and-deletions-indels-in-bacterial-genomes/](http://www.opiniomics.org/a-simple-test-for-uncorrected-insertions-and-deletions-indels-in-bacterial-genomes/)
- 590 21. Seemann T. Prokka: rapid prokaryotic genome annotation. *Bioinformatics (Oxford,*  
591 *England)*. [Online] 2014;30(14): 2068–9. Available from:  
592 [doi:10.1093/bioinformatics/btu153](https://doi.org/10.1093/bioinformatics/btu153)
- 593 22. *Fast and sensitive protein alignment using DIAMOND | Nature Methods*. [Online]  
594 Available from: <https://www.nature.com/articles/nmeth.3176> [Accessed: 24th January  
595 2019]
- 596 23. Page AJ, Cummins CA, Hunt M, Wong VK, Reuter S, Holden MTG, et al. Roary:  
597 Rapid large-scale prokaryote pan genome analysis. *Bioinformatics*. [Online]  
598 2015;31(22): 3691–3693. Available from: [doi:10.1093/bioinformatics/btv421](https://doi.org/10.1093/bioinformatics/btv421)
- 599 24. Clark SC, Egan R, Frazier PI, Wang Z. ALE: a generic assembly likelihood evaluation  
600 framework for assessing the accuracy of genome and metagenome assemblies.  
601 *Bioinformatics (Oxford, England)*. [Online] 2013;29(4): 435–443. Available from:  
602 [doi:10.1093/bioinformatics/bts723](https://doi.org/10.1093/bioinformatics/bts723)
- 603 25. Langmead B, Salzberg SL. Fast gapped-read alignment with Bowtie 2. *Nature Methods*.  
604 [Online] 2012;9(4): 357–359. Available from: [doi:10.1038/nmeth.1923](https://doi.org/10.1038/nmeth.1923)
- 605 26. Kurtz S, Phillippy A, Delcher AL, Smoot M, Shumway M, Antonescu C, et al. Versatile  
606 and open software for comparing large genomes. *Genome Biology*. [Online] 2004;5(2):  
607 R12. Available from: [doi:10.1186/gb-2004-5-2-r12](https://doi.org/10.1186/gb-2004-5-2-r12)
- 608 27. Hunt M, Kikuchi T, Sanders M, Newbold C, Berriman M, Otto TD. REAPR: a universal  
609 tool for genome assembly evaluation. *Genome Biology*. [Online] 2013;14(5): R47.  
610 Available from: [doi:10.1186/gb-2013-14-5-r47](https://doi.org/10.1186/gb-2013-14-5-r47)
- 611 28. Li H. Minimap2: pairwise alignment for nucleotide sequences. *Bioinformatics*. [Online]  
612 2018;34(18): 3094–3100. Available from: [doi:10.1093/bioinformatics/bty191](https://doi.org/10.1093/bioinformatics/bty191)
- 613 29. Walker BJ, Abeel T, Shea T, Priest M, Abouelliel A, Sakthikumar S, et al. Pilon: an  
614 integrated tool for comprehensive microbial variant detection and genome assembly  
615 improvement. *PloS One*. [Online] 2014;9(11): e112963. Available from:  
616 [doi:10.1371/journal.pone.0112963](https://doi.org/10.1371/journal.pone.0112963)
- 617 30. Rabsch W, Helm RA, Eisenstark A. Diversity of phage types among archived cultures  
618 of the Demerec collection of *Salmonella enterica* serovar Typhimurium strains. *Applied*  
619 *and Environmental Microbiology*. 2004;70(2): 664–669.

620

621

---

622 **FIGURES AND TABLES**

623 **Table 1. Summary of all assemblies in terms of circularised contigs.** Different rows refer to different isolates. "*n* of *m*" means that *n* contigs  
 624 were circular in the assembly out of *m* total contigs. When *n* and *m* are identical, it means that the assembly was considered complete, and these  
 625 cases are shaded in green. "Basic", "Corrected", "Filtered" and "Subsampled" refer to the strategies of long read preparation (see Methods).  
 626 "NA" refers to cases where the assembly pipeline repeatedly failed. The true number of circular structures was estimated by inspection.

| Isolate              | ONT (MinION) |           |          |            | PacBio (RSII System) |           |          |            | True circular structures (estimated) |
|----------------------|--------------|-----------|----------|------------|----------------------|-----------|----------|------------|--------------------------------------|
|                      | Basic        | Corrected | Filtered | Subsampled | Basic                | Corrected | Filtered | Subsampled |                                      |
| CFT073 (reference)   | 1 of 1       | 1 of 1    | 0 of 9   | 1 of 1     | 0 of 9               | 0 of 9    | 0 of 9   | 0 of 9     | 1                                    |
| MGH78578 (reference) | 6 of 6       | 4 of 7    | NA       | 6 of 6     | 4 of 7               | 2 of 22   | 2 of 22  | 2 of 22    | 6                                    |
| RBHSTW-00029         | 3 of 9       | 3 of 9    | 3 of 9   | 3 of 9     | 3 of 9               | 3 of 9    | 3 of 9   | 3 of 9     | 4                                    |
| RBHSTW-00053         | 6 of 6       | 6 of 6    | 6 of 6   | 6 of 6     | 6 of 6               | 6 of 6    | 6 of 6   | 6 of 6     | 6                                    |
| RBHSTW-00059         | 5 of 5       | 5 of 5    | 5 of 5   | 5 of 5     | 5 of 5               | 5 of 5    | 5 of 5   | 5 of 5     | 5                                    |
| RBHSTW-00122         | 4 of 4       | 4 of 4    | 4 of 4   | 4 of 4     | 4 of 4               | 4 of 4    | 4 of 4   | 4 of 4     | 4                                    |
| RBHSTW-00123         | 7 of 7       | NA        | 7 of 7   | 7 of 7     | 5 of 8               | 4 of 18   | 4 of 18  | 4 of 18    | 7                                    |
| RBHSTW-00127         | 5 of 5       | 5 of 5    | 5 of 5   | 5 of 5     | 5 of 5               | 5 of 5    | 5 of 5   | 5 of 5     | 5                                    |
| RBHSTW-00128         | 4 of 4       | 4 of 4    | 4 of 4   | 4 of 4     | 4 of 4               | 3 of 6    | 3 of 6   | 3 of 6     | 4                                    |
| RBHSTW-00131         | 4 of 4       | 2 of 7    | 4 of 4   | 4 of 4     | 3 of 15              | 4 of 5    | 3 of 15  | 2 of 15    | 4                                    |
| RBHSTW-00142         | 7 of 7       | 5 of 25   | 7 of 7   | 7 of 7     | 4 of 24              | 4 of 58   | 4 of 24  | 4 of 27    | 7                                    |
| RBHSTW-00167         | 9 of 9       | 5 of 15   | 10 of 10 | 9 of 9     | 4 of 34              | 3 of 60   | 3 of 60  | 3 of 60    | 9                                    |
| RBHSTW-00189         | 6 of 6       | 6 of 6    | 5 of 6   | 6 of 6     | 5 of 29              | 5 of 28   | 5 of 29  | 5 of 30    | 6                                    |
| RBHSTW-00277         | 2 of 2       | 2 of 2    | 1 of 8   | 2 of 2     | 1 of 8               | 1 of 8    | 1 of 8   | 1 of 8     | 2                                    |
| RBHSTW-00309         | 4 of 5       | 5 of 5    | 5 of 5   | 4 of 5     | 5 of 5               | 4 of 5    | 5 of 5   | 5 of 5     | 5                                    |
| RBHSTW-00340         | 3 of 11      | 3 of 11   | 4 of 4   | 4 of 4     | 2 of 25              | 2 of 25   | 2 of 24  | 2 of 25    | 4                                    |
| RBHSTW-00350         | 2 of 2       | 2 of 2    | 2 of 3   | 2 of 2     | 2 of 2               | 2 of 2    | 2 of 2   | 2 of 2     | 2                                    |
| RHB10-C07            | 1 of 1       | 1 of 1    | 1 of 1   | 1 of 1     | 1 of 1               | 1 of 1    | 1 of 17  | 1 of 1     | 1                                    |
| RHB11-C04            | 3 of 3       | 3 of 3    | 3 of 3   | 3 of 3     | 3 of 3               | 3 of 3    | 3 of 3   | 3 of 3     | 3                                    |
| RHB14-C01            | 1 of 12      | 1 of 12   | 1 of 15  | 1 of 12    | 1 of 15              | 1 of 15   | 1 of 15  | 1 of 15    | 2                                    |
| Total contigs        | 109          | 130       | 115      | 102        | 218                  | 294       | 276      | 265        | 87                                   |

|                                                                                                                                     | ONT (MinION) |          |          |          | PacBio (RSII System) |          |          |          |
|-------------------------------------------------------------------------------------------------------------------------------------|--------------|----------|----------|----------|----------------------|----------|----------|----------|
| Total circularised contigs (% over total estimated circular structures from Bandage: n=87 for all isolates)                         | 83 (95%)     | 67 (84%) | 77 (95%) | 84 (97%) | 67 (77%)             | 62 (71%) | 62 (71%) | 61 (70%) |
| Total circularised contigs for reference strains (i.e. structures known, total n=1 [ <i>E. coli</i> ] + 6 [ <i>K. pneumoniae</i> ]) | 7 (100%)     | 5 (71%)  | 0 (0%)   | 7 (100%) | 5 (71%)              | 2 (29%)  | 2 (29%)  | 2 (29%)  |
| Total isolates with all contigs circularised (% isolates)                                                                           | 16 (80%)     | 12 (60%) | 13 (65%) | 17 (85%) | 9 (45%)              | 7 (35%)  | 7 (35%)  | 8 (40%)  |



627 **Table 2. Comparison between PacBio and ONT-based hybrid assemblies.** Comparisons are shown using ALE, DNAdiff and REAPR (see Methods).  
 628 Different rows represent different isolates. All entries representing a better score for the PacBio assembly are shaded in red, those showing a better score for  
 629 ONT are shaded in blue. "ALE score" is the assembly likelihood difference (calculated by ALE from the mapping of Illumina reads) between PacBio and  
 630 ONT assemblies. "Unmapped reads" refers to the number of Illumina reads that ALE did not map to the corresponding assembly. "REAPR errors" refers to  
 631 the assembly errors found by REAPR by mapping Illumina reads to the corresponding assembly. For each isolate, one ONT and one PacBio-based assembly  
 632 with the best completion (i.e. number of circularised contigs) were chosen for comparison. DNAdiff results show the median (range) results from comparing  
 633 all assemblies for an isolate across read preparation strategies i.e. 4x4=16 comparisons for each isolate. "GSNPs" / "GIndels" refer to high-confidence SNPs /  
 634 indels between ONT and PacBio assemblies.

| Isolate                                       | ALE score | PacBio unmapped reads (% total) | ONT unmapped reads (% total) | PacBio REAPR errors | ONT REAPR errors | DNAdiff GSNPs | DNAdiff GIndels |
|-----------------------------------------------|-----------|---------------------------------|------------------------------|---------------------|------------------|---------------|-----------------|
| CFT073<br>(reference <i>E. coli</i> )         | -17928    | 29246 (0.89%)                   | 29240 (0.89%)                | 5                   | 5                | 1 (0-1)       | 0 (0-0)         |
| MGH78578<br>(reference <i>K. pneumoniae</i> ) | -1532602  | 41793 (1.31%)                   | 38371 (1.21%)                | 8                   | 7                | 6 (1-7)       | 0 (0-1)         |
| RBHSTW-00029                                  | 207465    | 50056 (1.85%)                   | 49876 (1.84%)                | 3                   | 3                | 0 (0-0)       | 0 (0-0)         |
| RBHSTW-00053                                  | 4727      | 50860 (1.62%)                   | 50861 (1.62%)                | 12                  | 11               | 1.5 (0-4)     | 0 (0-0)         |
| RBHSTW-00059                                  | -143627   | 37357 (1.04%)                   | 36251 (1.01%)                | 15                  | 14               | 0 (0-0)       | 0 (0-0)         |
| RBHSTW-00122                                  | 0         | 24355 (1.18%)                   | 24355 (1.18%)                | 6                   | 7                | 0 (0-0)       | 0 (0-0)         |
| RBHSTW-00123                                  | -1963188  | 56224 (1.68%)                   | 57074 (1.70%)                | 17                  | 21               | 4 (1-6)       | 4.5 (2-6)       |
| RBHSTW-00127                                  | -1145     | 34206 (0.98%)                   | 34206 (0.98%)                | 16                  | 16               | 0 (0-0)       | 0 (0-0)         |
| RBHSTW-00128                                  | 3114      | 31526 (1.06%)                   | 31507 (1.05%)                | 6                   | 8                | 2 (1-2)       | 2 (1-4)         |
| RBHSTW-00131                                  | 399368    | 25880 (0.88%)                   | 26271 (0.89%)                | 24                  | 28               | 3 (1-7)       | 1 (1-3)         |
| RBHSTW-00142                                  | -790773   | 34684 (1.23%)                   | 32590 (1.16%)                | 12                  | 12               | 3 (1-11)      | 0 (0-1)         |
| RBHSTW-00167                                  | 4083063   | 34510 (1.13%)                   | 76805 (2.52%)                | 24                  | 33               | 21 (18-47)    | 1.5 (0-4)       |
| RBHSTW-00189                                  | -158523   | 37378 (1.25%)                   | 37418 (1.25%)                | 9                   | 12               | 11.5 (7-21)   | 1 (0-2)         |
| RBHSTW-00277                                  | 18417     | 33677 (0.99%)                   | 33685 (0.99%)                | 16                  | 16               | 2 (0-2)       | 0 (0-0)         |
| RBHSTW-00309                                  | -518811   | 30704 (0.88%)                   | 30327 (0.87%)                | 17                  | 36               | 2 (0-11)      | 44.5 (0-86)     |
| RBHSTW-00340                                  | -906675   | 30802 (0.87%)                   | 29860 (0.84%)                | 11                  | 10               | 2 (0-4)       | 0 (0-1)         |
| RBHSTW-00350                                  | 21188     | 28907 (0.79%)                   | 28907 (0.79%)                | 12                  | 13               | 2 (2-4)       | 5 (0-8)         |
| RHB10-C07                                     | -23295    | 27779 (0.90%)                   | 27777 (0.90%)                | 22                  | 21               | 5 (0-17)      | 0.5 (0-1)       |
| RHB11-C04                                     | 12774     | 24879 (0.86%)                   | 24881 (0.86%)                | 25                  | 25               | 2 (0-6)       | 0 (0-0)         |
| RHB14-C01                                     | 172712    | 30478 (0.95%)                   | 30576 (0.95%)                | 13                  | 12               | 3 (0-3)       | 0 (0-0)         |

635 **Figure 1. Examples of genome structure uncertainty in hybrid assemblies in a) the**  
 636 **chromosome and b) the accessory genome.** (a) An ONT+Illumina hybrid assembly for  
 637 isolate RBHSTW-00029 using the “Basic” long read preparation strategy. b) A  
 638 PacBio+Illumina hybrid assembly for isolate MGH78578 using the “Corrected” long read  
 639 preparation strategy. Plots were obtained using Bandage, with grey boxes indicating  
 640 unresolved structures. Each contig is annotated with contig length and Illumina coverage;  
 641 connections between contigs represent overlaps between contig ends. The assembly for  
 642 RHBSTW-00029 in a) and that of isolate RHB14-C01 (which showed a similar pattern of  
 643 chromosome structure uncertainty) represented the only two datasets that could not be  
 644 completely assembled with any of the attempted strategies using ONT+Illumina data. They  
 645 were also not fully assembled by any PacBio+Illumina strategy, which similarly failed to  
 646 completely assemble isolates RBHSTW-00189, RBHSTW-00277, RBHSTW-340 and  
 647 CFT073 (Figure S4). The pattern in b) was only observed for PacBio+Illumina data, and was  
 648 the reason for incomplete assemblies for isolates RBHSTW-00123, RBHSTW-00131,  
 649 RBHSTW-00142, RBHSTW-00167 and MGH78578 (Figure S4).

(a) *C. freundii* RBHSTW-00029  
 ONT+Illumina, "Basic"

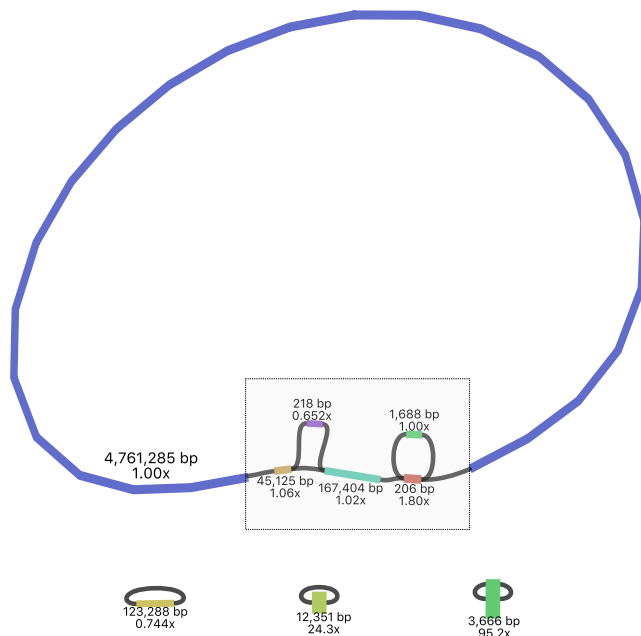

(b) *K. pneumoniae* MGH78578  
 PacBio+Illumina, "Corrected"

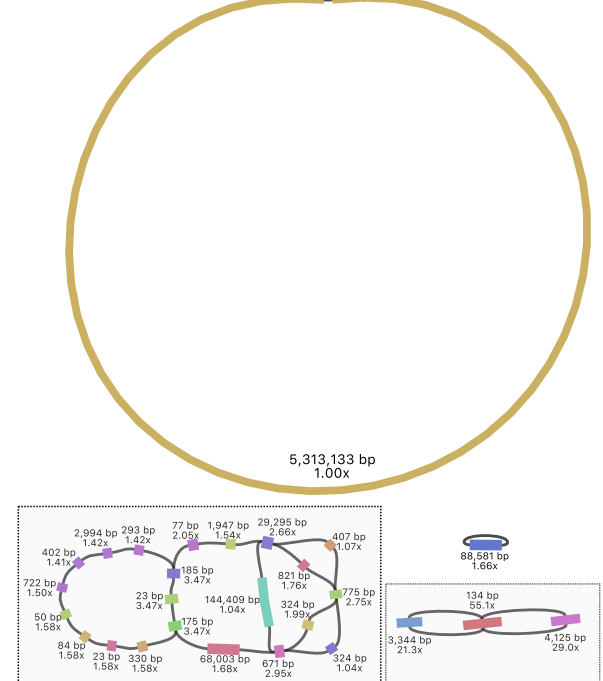

651 **Figure 2. Examples of mismatches identified between the ONT-based and the PacBio-**  
 652 **based assemblies for the two reference strains (*E. coli* CFT073 and *K. pneumoniae***  
 653 **MGH78578).** Each sub-figure is an IGV (v2.4.3) view of part of the PacBio-based assembly,  
 654 centered around a PacBio-ONT SNP, with all reads from the same isolate mapped to it. We  
 655 performed this analysis for all SNPs in isolates MGH78578 and CFT073, and report  
 656 examples for the two most typical patterns observed. a) SNP from MGH78578 with very low  
 657 Illumina coverage, but normal PacBio and ONT coverage. Most of the Illumina reads have a  
 658 different base than the one in the PacBio-assembled reference (the red T's), suggesting  
 659 perhaps an error in the PacBio assembly. A similar pattern is observed in 14 SNPs in CFT073  
 660 (with 12 due to error in the PacBio assembly), and 11 SNPs in MGH78578 (with 10 due to  
 661 error in the PacBio assembly). b) SNP from MGH78578 with normal Illumina coverage;  
 662 Illumina reads support both bases with similar proportions, suggesting that this could be a  
 663 polymorphic site within the original DNA sample. This pattern was observed for 4 SNPs in  
 664 CFT073 and for 13 SNPs in MGH78578.

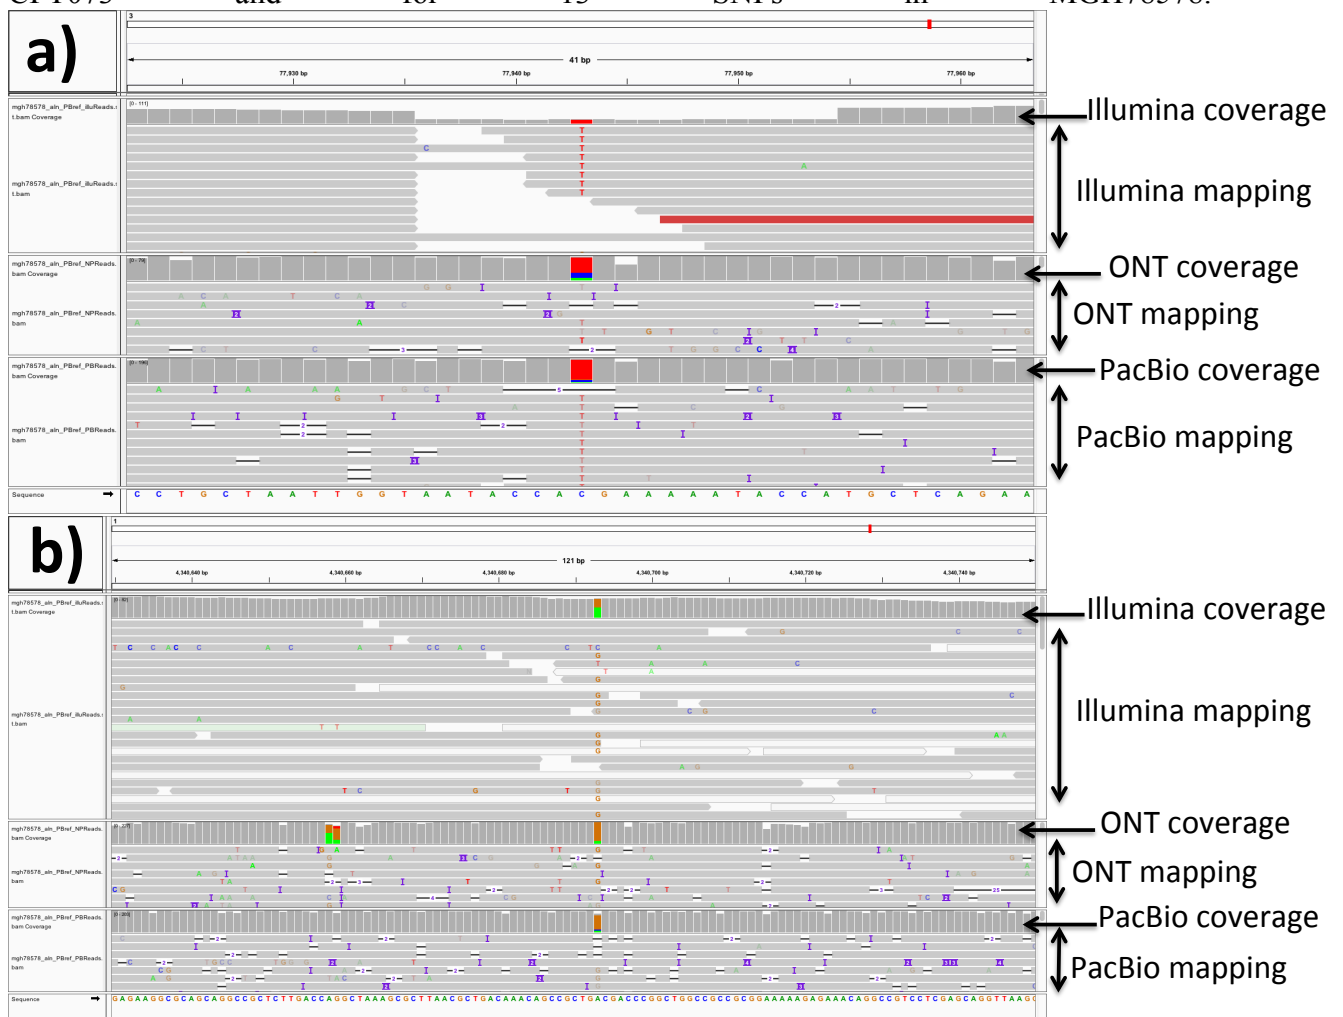

665

## SUPPLEMENTARY FIGURES AND TABLES

666

667 **Figure S1. Read counts and read length distributions for ONT and PacBio outputs.**

668

669 **Figure S2. Summary of read-to-assembly alignments.** All assemblies considered were  
670 obtained using all reads of the given type. Reads are classified as "good" if they have at least  
671 one mapping covering 97% of the read. They are classified as a putative "chimera" if they  
672 have multiple inconsistent alignments with at least 10% of read length and 70% identity.  
673 Complete statistics from minimap2/Filtlong outputs are in Table S2.

674

675 **Figure S3. Mean percent identities and identity N50 values of ONT/PacBio reads**  
676 **aligned to the hybrid assemblies.** We considered the average identity for each base, and if  
677 there were multiple alignments at a base, we used the one with the best score. We aligned  
678 PacBio reads to the hybrid assembly obtained from all PacBio reads. We aligned ONT reads  
679 to the hybrid assembly obtained from all ONT reads. Identity N50 represents the percent  
680 identity for which half of the total bases are in reads with this identity value or higher.  
681 Complete statistics are in Table S3.

682

683 **Figure S4. Bandage plots for hybrid assemblies.** Each square represents one genome  
684 assembly. Shown are the ONT+Illumina (left) and PacBio+Illumina (right) assemblies for  
685 each isolate (4 columns of 5 isolates). All assembly plots are for the globally optimal long  
686 read preparation strategy for each sequencing approach i.e. "Subsampled" for ONT+Illumina  
687 and "Basic" for PacBio+Illumina (see Methods). Sequential colours for plasmids are for  
688 identical structures within isolates, but not between.

689

690 **Figure S5. Percentage of proteins with a length <90% of top UniProt hit.** Proteins in  
691 assemblies were annotated with Prokka then blasted with DIAMOND against the full UniProt  
692 database (see Methods). The proportion of proteins with a length <90% of their top UniProt  
693 hit gives a simple test for artificially shortened proteins due to indel errors in assembly. The  
694 black dashed line indicates the percentage in an existing high-quality reference genome for *E.*  
695 *coli* MG1655 (157 proteins out of 4240; RefSeq GCF\_000005845.2). Absolute numbers were  
696 all <250; shown here is the value as a percentage of the maximum number of proteins  
697 observed in any assembly for the sample to allow comparison between different genome  
698 sizes.

699

700 **Figure S6. Comparison of discrepancy in total Prokka annotated regions across all**  
701 **assemblies.** The discrepancy is the number of annotated regions in the ONT+Illumina  
702 assembly minus the number of annotated regions in the PacBio+Illumina assembly. All  
703 4x4=16 comparisons of read preparation strategies are shown.

704

705 **Table S1. Summary of sequenced isolates, DNA inputs and raw sequencing metrics.**  
706 Statistics in this table refer to raw (i.e. unfiltered) sequencing data. ONT read statistics were  
707 generated with nanostat (v0.22).

708

709 **Table S2. Classification of long reads from PacBio and ONT.** "PB" indicates PacBio.  
710 "PB2ONT" represents PacBio reads mapped to the ONT hybrid assembly, and so on. All  
711 assemblies considered were obtained using all reads of the given type. We show the number  
712 of reads falling in different categories according to how they map to the assemblies. Reads  
713 are classified as "Good" if they have at least one mapping covering 97% of the read. They are

714 classified as a putative "chimera" if they have multiple inconsistent alignments with at least  
715 10% of read length and 70% identity.

716

717 **Table S3. Properties of long reads from PacBio and ONT.** "PB" indicates PacBio. Reads  
718 were mapped to the assemblies using minimap2 to determine identity. We considered the  
719 average identity for each base, and if there were multiple alignments at a base, we used the  
720 one with the best score. We aligned PacBio reads to the hybrid assembly obtained from all  
721 PacBio reads. We aligned ONT reads to the hybrid assembly obtained from all ONT reads.  
722 N50 represents the length or identity for which half of the read bases are in reads of at least  
723 such length or identity.

724

725 **Table S4. Assembly runtimes in minutes.** All assemblies were run with dual 8-core Intel  
726 IvyBridge 2.6GHz, 256GB 1866MHz memory. Times include running times for Canu  
727 correction and read filtering.

728

729 **Table S5. Location and counts of proteins found uniquely in (a) ONT-based or (b)  
730 PacBio-based assembly for each sample.** Shown here is the comparison between assemblies  
731 using the globally optimal long read preparation strategy for each sequencing approach i.e.  
732 "Subsampled" for ONT+Illumina and "Basic" for PacBio+Illumina (as in Figure S4).  
733 Proteins from assemblies for each sample were clustered using Roary after annotation with  
734 Prokka. Contig order indicates size order in the relevant assembly (see Figure S4). The start  
735 of the greyed-out squares indicates the total number of contigs in the assembly.

736

737 **Table S6. Results of DNAdiff comparison between reference genomes (*E. coli* CFT073  
738 and *K. pneumoniae* MGH78578 genomes) and hybrid assemblies with either PacBio or  
739 ONT.** Each row corresponds to a comparison, either between the reference and PacBio  
740 assembly, or between the reference and the ONT assembly, or between the two *de novo*  
741 hybrid assemblies. "Length difference" means the difference in total length of the two  
742 genomes. "Aligned bases (ref)" represents the number of bases from the first comparison  
743 genome that are aligned with the other genome in the comparison. In each comparison the  
744 ONT assembly is the one obtained using half of the long reads, while the PacBio assembly is  
745 obtained following long read correction.

746

747 **Table S7. Simulating the effect of increased level of ONT multiplexing on hybrid  
748 assembly.** Values represent numbers of contigs, either circular contigs, or any contig. Three  
749 simulations are presented, either with all reads, with half the reads, or with one third of the  
750 reads.
