# 1 **Comparison of long-read sequencing technologies in** 2 **the hybrid assembly of complex bacterial genomes**

3

4 Nicola De Maio<sup>1\*</sup>, Liam P. Shaw<sup>1\*</sup>, Alisdair Hubbard<sup>2</sup>, Sophie George<sup>1,3</sup>, Nick Sanderson<sup>1</sup>,  
5 Jeremy Swann<sup>1</sup>, Ryan Wick<sup>4</sup>, Manal AbuOun<sup>5</sup>, Emma Stubberfield<sup>5</sup>, Sarah J. Hoosdally<sup>1</sup>,  
6 Derrick W. Crook<sup>1,3</sup>, Timothy E. A. Peto<sup>1,3</sup>, Anna E. Sheppard<sup>1,3</sup>, Mark J. Bailey<sup>6</sup>, Daniel S.  
7 Read<sup>6</sup>, Muna F. Anjum<sup>5</sup>, A. Sarah Walker<sup>1,3</sup>, Nicole Stoesser<sup>1</sup> on behalf of the REHAB  
8 consortium  
9

10 1: Nuffield Department of Medicine, University of Oxford, Oxford, UK.

11 2: Department of Tropical Disease Biology, Liverpool School of Tropical Medicine,  
12 Liverpool, L3 5QA, UK.

13 3: HPRU IHR Health Protection Research Unit in Healthcare Associated Infections and  
14 Antimicrobial Resistance at University of Oxford in partnership with Public Health England,  
15 Oxford, UK.

16 4: Department of Biochemistry and Molecular Biology, Bio21 Molecular Science  
17 and Biotechnology Institute, University of Melbourne, Australia.

18 5: Department of Bacteriology, Animal and Plant Health Agency, Addlestone, Surrey, KT15  
19 3NB, UK.

20 6: Centre for Ecology & Hydrology, Benson Lane, Crowmarsh Gifford, Wallingford, OX10  
21 8BB, UK.

22

23 \* These authors contributed equally.

24

25 Corresponding authors: Nicole Stoesser, [nicole.stoesser@ndm.ox.ac.uk](mailto:nicole.stoesser@ndm.ox.ac.uk)

## 26 ABSTRACT

27 Illumina sequencing allows rapid, cheap and accurate whole genome bacterial analyses, but  
28 short reads (<300 bp) do not usually enable complete genome assembly. Long read  
29 sequencing greatly assists with resolving complex bacterial genomes, particularly when  
30 combined with short-read Illumina data (hybrid assembly). However, it is not clear how  
31 different long-read sequencing methods impact on assembly accuracy. Relative automation of  
32 the assembly process is also crucial to facilitating high-throughput complete bacterial genome  
33 reconstruction, avoiding multiple bespoke filtering and data manipulation steps. In this study,  
34 we compared hybrid assemblies for 20 bacterial isolates, including two reference strains,  
35 using Illumina sequencing and long reads from either Oxford Nanopore Technologies (ONT)  
36 or from SMRT Pacific Biosciences (PacBio) sequencing platforms. We chose isolates from  
37 the Enterobacteriaceae family, as these frequently have highly plastic, repetitive genetic  
38 structures and complete genome reconstruction for these species is relevant for a precise  
39 understanding of the epidemiology of antimicrobial resistance. We *de novo* assembled  
40 genomes using the hybrid assembler Unicycler and compared different read processing  
41 strategies. Both strategies facilitate high-quality genome reconstruction. Combining ONT and  
42 Illumina reads fully resolved most genomes without additional manual steps, and at a lower  
43 consumables cost per isolate in our setting. Automated hybrid assembly is a powerful tool for  
44 complete and accurate bacterial genome assembly.

45

## 46 IMPACT STATEMENT

47 Illumina short-read sequencing is frequently used for tasks in bacterial genomics, such as  
48 assessing which species are present within samples, checking if specific genes of interest are  
49 present within individual isolates, and reconstructing the evolutionary relationships between  
50 strains. However, while short-read sequencing can reveal significant detail about the genomic  
51 *content* of bacterial isolates, it is often insufficient for assessing genomic *structure*: how  
52 different genes are arranged within genomes, and particularly which genes are on plasmids –  
53 potentially highly mobile components of the genome frequently carrying antimicrobial  
54 resistance elements. This is because Illumina short reads are typically too short to span  
55 repetitive structures in the genome, making it impossible to accurately reconstruct these  
56 repetitive regions. One solution is to complement Illumina short reads with long reads  
57 generated with SMRT Pacific Biosciences (PacBio) or Oxford Nanopore Technologies (ONT)  
58 sequencing platforms. Using this approach, called ‘hybrid assembly’, we show that we can  
59 automatically fully reconstruct complex bacterial genomes of Enterobacteriaceae isolates in  
60 the majority of cases (best-performing method: 17/20 isolates). In particular, by comparing  
61 different methods we find that using the assembler Unicycler with Illumina and ONT reads  
62 represents a low-cost, high-quality approach for reconstructing bacterial genomes using  
63 publicly available software.

64

## 65 DATA SUMMARY

66 Raw sequencing data and assemblies have been deposited in NCBI under BioProject  
67 Accession PRJNA422511 (<https://www.ncbi.nlm.nih.gov/bioproject/PRJNA422511>). We  
68 confirm all supporting data, code and protocols have been provided within the article or  
69 through supplementary data files.

## 70 INTRODUCTION

71 The rapid development of microbial genome sequencing methods over the last decade has  
72 revolutionized infectious disease epidemiology, and whole genome sequencing has become  
73 the standard for many molecular typing applications in research and public health (1–4).  
74 Much of this evolution has been driven by the development of high-throughput, low-cost,  
75 second generation (short-read) sequencing methods, such as Illumina’s HiSeq and MiSeq  
76 platforms, which produce millions of low-error (0.1%) paired-end reads, generally 100-300bp  
77 in length. As such, Illumina sequencing has become the most widely used sequencing  
78 technology for microbial genomics. Multiple read processing algorithms now exist, typically  
79 enabling variant detection following mapping to a reference genome to assess genetic  
80 relatedness (e.g. for outbreak investigation or population genetic studies), or *de novo*  
81 assembly to facilitate the identification of important loci in the accessory genome, such as  
82 antimicrobial resistance genes (e.g. for epidemiological studies of resistance gene prevalence  
83 or for susceptibility prediction).

84  
85 However, it has become clear that short-read sequencing has significant limitations  
86 depending on the bacterial species and/or epidemiological question. These limitations largely  
87 arise from the inability to fully reconstruct genomic structures of interest from short reads,  
88 including those on chromosomes and mobile genetic elements such as plasmids (5). An  
89 example where this genomic structure is highly relevant is the study of antimicrobial  
90 resistance (AMR) gene transmission and evolution in species of Enterobacteriaceae, which  
91 have emerged as a major clinical problem in the last decade (6). Short-read data from these  
92 species do not successfully facilitate assembly of the repetitive structures that extend beyond  
93 the maximum read length generated, including structures such as resistance gene cassettes,  
94 insertion sequences and transposons that are of crucial biological relevance to understanding  
95 the dissemination of key antimicrobial resistance genes.

96  
97 The most widely used single molecule, long-read sequencing platforms, currently represented  
98 by Pacific Biosciences’ (PacBio) Single Molecule Real-Time (SMRT) and Oxford Nanopore  
99 Technologies’ (ONT) MinION sequencers, are often able to overcome these limitations by  
100 generating reads with a median length of 8-10kb, and as long as 100kb (5,7,8). However, the  
101 sequencing error rates of both long-read methods are much greater than Illumina (PacBio: 11-  
102 15%, raw, less in circular consensus reads (9); ONT: 5-40% (10)). Hybrid assembly, using  
103 combined short-read and long-read sequencing datasets, has emerged as a promising  
104 approach to generating fully resolved, accurate genome assemblies. With hybrid approaches,  
105 long reads provide information regarding the structure of the genome, specifically in  
106 plasmids, and short reads facilitate detailed assembly at local scales, and can be used to  
107 correct errors in long reads (11–13). The hybrid assembly tool Unicycler has been shown to  
108 outperform other hybrid assemblers in generating fully closed genomes (12).

109  
110 We are not aware of any previously published direct comparisons of hybrid bacterial  
111 assemblies generated using long-read sequencing methods, yet the selection of a long-read  
112 sequencing approach has important cost, throughput and logistical implications. Currently,  
113 the two dominant long-read technologies are ONT and PacBio. The ONT MinION is a highly  
114 portable platform that has been deployed in several molecular laboratories, including those in  
115 low-income settings (14). Reported data yields of 10-30Gb and indexed barcoding now  
116 enable multiplexing of up to 12 bacterial isolates on a run (13). In contrast, the PacBio  
117 platform is non-portable but has been around longer, making it the most widely used for  
118 generating reference-grade bacterial assemblies to date (by way of example: as of 21<sup>st</sup>  
119 January 2019, NCBI Assembly contains 201 *E. coli* assemblies generated with PacBio vs. 3  
120 generated with MinION).

121  
122 Here we compared different approaches for hybrid bacterial genome assembly, using ONT  
123 MinION, PacBio and Illumina HiSeq data generated from the same DNA extracts. We  
124 selected 20 bacterial isolates from four genera of the Enterobacteriaceae family of bacteria  
125 (*Escherichia*, *Klebsiella*, *Citrobacter* and *Enterobacter*) including two reference strains.  
126 These genera typically have large bacterial genomes between 5-6.5Mb with diverse sets of  
127 plasmids (15). We compared the advantages and disadvantages of ONT+Illumina versus  
128 PacBio+Illumina hybrid assembly, including the need for additional manual processing steps.  
129 We also investigated different strategies to optimize hybrid assembly using Unicycler for  
130 both long-read approaches.

131

## 132 **METHODS**

### 133 **Bacterial isolates, DNA extraction and Illumina sequencing**

134 For sequencing, we selected and sub-cultured 20 isolates across the four genera of interest  
135 from stocks of pure culture, stored in nutrient broth with 10% glycerol at -80°C. Sub-  
136 cultures were undertaken aerobically on Columbia blood agar at 37°C overnight. We chose  
137 two reference strains, *Escherichia coli* CFT073, and *Klebsiella pneumoniae* MGH78578, and  
138 18 isolates that were part of a study investigating antimicrobial resistance in diverse  
139 Enterobacteriaceae from farm animals and environmental specimens (the REHAB study  
140 <http://modmedmicro.nsms.ox.ac.uk/rehab>; details of isolates in Table S1). These comprised *E. coli*  
141 (n=4), *K. pneumoniae* (n=2), *K. oxytoca* (n=2), *Citrobacter freundii* (n=2), *C. braakii* (n=2),  
142 *C. gillenii* (n=1), *Enterobacter cloacae* (n=3), *E. kobei* (n=2). We chose to investigate  
143 Enterobacteriaceae isolates as these bacteria are genetically complex: their genomes  
144 commonly contain multiple plasmids and repeat structures of varying size, making them  
145 difficult to assemble using other methods (5).

146

147 DNA was extracted from sub-cultured isolates using the Qiagen Genomic tip 100/G kit  
148 (Qiagen, Valencia, CA, USA) to facilitate long-fragment extraction. Quality and fragment  
149 length distributions were assessed using the Qubit fluorometer (ThermoFisher Scientific,  
150 Waltham, MA, USA) and TapeStation (Agilent, Santa Clara, CA, USA).

151

152 All DNA extracts were sequenced using the Illumina HiSeq 4000, generating 150bp paired-  
153 end reads. Libraries were constructed using the NEBNext Ultra DNA Sample Prep Master  
154 Mix Kit (NEB, Ipswich, MA, USA) with minor modifications and a custom automated  
155 protocol on a Biomek FX (Beckman Coulter, Brea, CA, USA). Ligation of adapters was  
156 performed using Illumina Multiplex Adapters, and ligated libraries were size-selected using  
157 Agencourt Ampure magnetic beads (Beckman Coulter, Brea, CA, USA). Each library was  
158 PCR-enriched with custom primers (index primer plus dual index PCR primer (16)).  
159 Enrichment and adapter extension of each preparation was obtained using 9µl of size-selected  
160 library in a 50µl PCR reaction. Reactions were then purified with Agencourt Ampure XP  
161 beads (Beckman Coulter, Brea, CA, USA) on a Biomek NXp after 10 cycles of amplification  
162 (as per Illumina recommendations). Final size distributions of libraries were determined using  
163 a TapeStation system as above and quantified by Qubit fluorometry.

164

### 165 **ONT library preparation and sequencing**

166 ONT sequencing libraries were prepared by multiplexing DNA extracts from four isolates per  
167 flowcell using the SQK-LSK108 and EXP-NBD103 kits according to the manufacturer's  
168 protocol with the following amendments: input DNA (1.5µg) was not fragmented, 2ml  
169 Eppendorf DNA LoBind tubes (Eppendorf, Hamburg, Germany) were used, all reactions  
170 were purified using 0.4x Agencourt AMPure XP beads, incubation time with Agencourt

171 AMPure XP beads was doubled, elution volumes were reduced to the minimum required for  
172 the subsequent step, and elution was heated to 37°C. Libraries were loaded onto flow cell  
173 versions FLO-MIN106 R9.4 SpotON and sequenced for 48 hours.

174

### 175 **PacBio library preparation and sequencing**

176 DNA extracts were initially sheared to an average length of 15kb using g-tubes, as specified  
177 by the manufacturer (Covaris, Woburn, MA, USA). Sheared DNA was used in SMRTbell  
178 library preparation, as recommended by the manufacturer. Quantity and quality of the  
179 SMRTbell libraries were evaluated using the High Sensitivity dsDNA kit and Qubit  
180 fluorometer and DNA 12000 kit on the 2100 Bioanalyzer (Agilent, Santa Clara, CA, USA).  
181 To obtain the longest possible SMRTbell libraries for sequencing (as recommended by the  
182 manufacturer), a further size selection step was performed using the PippinHT pulsed-field  
183 gel electrophoresis system (Sage Science, Beverly, MA, USA), enriching for the SMRTbell  
184 libraries >15kb for loading onto the instrument. Sequencing primer and P6 polymerase were  
185 annealed and bound to the SMRTbell libraries, and each library was sequenced using a single  
186 SMRT cell on the PacBio RSII sequencing system with 240-minute movies.

187

### 188 **Read preparation and hybrid assembly**

189 ONT fast5 read files were base-called with Albacore (v2.0.2, [https://github.com/JGI-](https://github.com/JGI-Bioinformatics/albacore)  
190 [Bioinformatics/albacore](https://github.com/JGI-Bioinformatics/albacore)), with barcode demultiplexing and fastq output. Adapter sequences were  
191 trimmed with Porechop (v0.2.2, <https://github.com/rrwick/Porechop>). Read quality was calculated  
192 with nanostat (v0.22, <https://github.com/wdecoster/nanostat>) (17).

193

194 Long reads from both ONT and PacBio were prepared using four alternative strategies:

- 195 • **Basic:** no filtering or correction of reads (i.e. all long reads available used for  
196 assembly).
- 197 • **Corrected:** Long reads were error-corrected and subsampled (preferentially selecting  
198 longest reads) to 30-40x coverage using Canu (v1.5, <https://github.com/marbl/canu>) (7)  
199 with default options.
- 200 • **Filtered:** long reads were filtered using Filtlong (v0.1.1, <https://github.com/rrwick/Filtlong>)  
201 by using Illumina reads as an external reference for read quality and either removing  
202 10% of the worst reads or by retaining 500Mbp in total, whichever resulted in fewer  
203 reads. We also removed reads shorter than 1kb and used the --trim and --split 250  
204 options.
- 205 • **Subsampled:** we randomly subsampled long reads to leave approximately 600Mbp  
206 (corresponding to a long read coverage around 100x).

207 Hybrid assembly for each of the two long-read sequencing technologies and for each of the  
208 four read processing strategies (for a total of 8 hybrid assemblies per isolate) was performed  
209 using Unicycler (v0.4.0) (12) with default options.

210

211 We used Bandage (v0.8.1) (18) to visualize assemblies, and the Interactive Genome Viewer  
212 (IGV) (19) to visualize discrepancies in assemblies produced by the different methods.

213

214 To simulate the effect of additional multiplexing on ONT data and assembly (with current kits  
215 allowing for up to 12 isolates to be indexed), we randomly subsampled half or one third of  
216 the ONT reads from each isolate and repeated the assembly as in the “Basic” strategy above.

217

### 218 **Assembly comparison**

219 We used multiple strategies to compare the features of different hybrid assemblies of the  
220 same DNA extract. Firstly, we considered the completeness of an assembly i.e. specifically

221 whether all contigs reconstructed by Unicycler were identified as circular structures. Circular  
222 structures typically represent completely assembled bacterial chromosomes and plasmids;  
223 circular structures from different assemblies in our 20 isolates tended to agree in the majority  
224 of cases (Table 1) and agreed with the structures of reference genomes for the two reference  
225 strains (CFT073 and MH78578). We therefore also used the number of circular contigs in an  
226 assembly as a measure of its completeness.

227  
228 A common error associated with long-read-based assemblies is indel errors, which can  
229 artificially shorten proteins by introducing premature stop codons or frameshift errors (20).  
230 To check this possibility we annotated genomes with Prokka (v1.13.3,  
231 <https://github.com/tseemann/prokka>) (21) then aligned all proteins to the full UniProt TrEMBL  
232 database (November 15<sup>th</sup> 2018) using DIAMOND (v0.9.22, <https://github.com/bbuchfink/diamond>)  
233 (22) and compared the length of each protein to its top hit. We compared proteins in  
234 assemblies for the same sample with Roary (v3.12.0, <https://sanger-pathogens.github.io/Roary>) (23).

235  
236 We additionally compared different assemblies of the same extract using:

- 237 • ALE (24), which assesses the quality of different assemblies using a likelihood-based  
238 score of how well Illumina reads map to each assembly. ALE was run with default  
239 parameters; Illumina reads were mapped to references using Bowtie2 (v2.3.3) (25).
- 240 • DNAdiff (as part of MUMMER v3.23) (26), which compares assemblies of the same  
241 strain to detect differences such as SNPs and indels. DNAdiff was run with default  
242 parameters on the fasta assembly files.
- 243 • REAPR (v1.0.18) (27), which (similarly to ALE) evaluates the accuracy of assemblies  
244 using information from short read mapping to the assembly. REAPR was run using  
245 the options “fcheck”, “smaltmap” and “pipeline” with default parameters.
- 246 • Minimap2 (v2017-09-21) (28) was used to map long reads to the hybrid assemblies,  
247 and the mappings were evaluated to compare assembly quality and long read features  
248 (identity and length) using scripts from the Filtlong package. We considered the  
249 average identity for each base, and if there were multiple alignments at a base, we  
250 used the one with the best score. We aligned PacBio and ONT reads to the hybrid  
251 assemblies obtained either from all PacBio reads or from all ONT reads. Read  
252 alignments were classified as: “good” if they had at least one alignment covering 97%  
253 of the read, as a putative “chimera” if they had multiple inconsistent alignments  
254 represented by at least 10% of the read length and  $\geq 70\%$  nucleotide identity, and  
255 “other” if they did not fall into either of the two previous categories.

256

## 257 RESULTS

### 258 Sequencing data quality

259 For Illumina data, a median of 2,457,945 (interquartile range [IQR]: 2,073,342-2,662,727)  
260 paired reads was generated for each isolate, with a median insert size of 363 bp (351-369).  
261 The %GC content per isolate varied, as expected, by genus (median 53%, range: 50-57%),  
262 but was consistent with the expected %GC content for each isolate based on its species (Table  
263 S1).

264  
265 The PacBio SMRT sequencing data resulted in a median of 160,740 (IQR: 153,196-169,240)  
266 sub-reads with median sub-read length of 11,050 bp (IQR: 10,570-11,209 bp) per isolate.  
267 Each isolate was sequenced using one SMRT cell on the RSII sequencing system, generating  
268 a median of 1.32Gb (IQR: 1.25-1.36) of data per isolate, with isolates being run in batches of  
269 8 (Figure S1, Table S1). For the ONT data, a median of 102,875 reads (IQR: 70,508-143,745

270 reads) were generated for each isolate, with a median phred score of 11.8 (IQR: 11.4-12.3).  
271 ONT reads had a median length of 14,212 bp (IQR: 13,369-16,267 bp). A median of 13.8Gb  
272 (IQR: 10.8-14.7Gb) of data was generated per run, resulting in a median of 3.45Gb per  
273 isolate (four isolates multiplexed per run) (Figure S1, Table S1). After hybrid assembly, the  
274 mean percentage identity and identity N50 for reads aligned against their respective  
275 assemblies were higher for ONT reads than PacBio reads (mean $\pm$ s.d. read alignment identity:  
276 86 $\pm$ 7 vs. 78 $\pm$ 17; Figure S3, Table S3).

277

### 278 **Hybrid assembly runtimes**

279 Clearly the computing infrastructure available to any given research team will be widely  
280 variable, and assembly runtimes will therefore be different. For this experiment, where all  
281 assemblies were run with dual 8-core Intel IvyBridge 2.6GHz, 256GB 1866MHz memory,  
282 assembly times averaged between 1600-8000 minutes (~26-130 hours, Table S4), depending  
283 on long-read preparation strategy (i.e. basic, corrected, filtered, sub-sampled, as in Methods).  
284 They did not significantly vary depending on type of long-read used as input. Assemblies  
285 completed in all cases, apart from two cases (both ONT+Illumina hybrids: MGH78578  
286 reference strain, filtered strategy; RBHSTW-00123, corrected strategy).

287

### 288 **PacBio vs. ONT-based hybrid assembly comparisons**

289 Using ONT+Illumina hybrid assembly approaches, we were able to completely assemble (i.e.  
290 all contigs circularised) the majority of genomes (between 12 [60%] and 17 [85%] depending  
291 on the preparation strategy for long reads, Table 1) without any manual intervention (18  
292 across all strategies). With PacBio+Illumina fewer assemblies were complete (between 7  
293 [35%] and 9 [45%]). More contigs were also circularised with ONT than with PacBio (up to  
294 84 [97%] versus 67 [77%]), and assemblies were less fragmented (a minimum of 102 total  
295 contigs across all 20 isolates for ONT vs. a minimum of 218 for PacBio).

296

297 On the basis of the minimap2/Filtlong comparisons (see Methods), most reads from both  
298 long-read platforms had “good” alignment to their respective assemblies (~103,000 reads on  
299 average for PacBio vs. ~99,000 reads for ONT, Figure S2, Table S2), with slightly more  
300 alignments classified as “chimeras” (4,502 vs. 1,074 reads) and a much larger number of  
301 alignments that were poor and classified as “other” (54,449 vs. 8,222) for PacBio compared  
302 to ONT reads (Figure S2, Table S2).

303

304 Some chromosomal regions proved hard to assemble with both PacBio and ONT, e.g. for  
305 isolates RBHSTW-00029 and RHB14-C01, but one of the noticeable differences between the  
306 two methods was the ability of ONT to resolve repeats on small plasmids (see Figure 1 and  
307 Figure S4). The DNA fragment size selection process used to optimize PacBio sequencing  
308 and recommended by the manufacturer may have contributed to this (see Methods),  
309 essentially making the assembly of small plasmids reliant on the Illumina short-read  
310 component of the dataset only. This also reduces the power of PacBio reads for resolving the  
311 genome structure when one copy of a repeated region is present on a short plasmid.

312

313 While correcting ONT reads with Canu or filtering them with Filtlong improved assembly  
314 completeness for one isolate (RBHSTW-00309), in most cases avoiding this ONT read  
315 correction and filtration led to better results (Table 1). This might be due to correction and  
316 filtration steps removing reads in a non-uniform way across the genome, and in particular  
317 from regions that are already hard to assemble. An alternative strategy deployed to reduce the  
318 computational burden of hybrid assembly was to randomly sub-sample long reads until a  
319 certain expected coverage was reached. Table 1 shows that this strategy was preferable to  
320 read correction and filtration: it did not reduce assembly completeness but did reduce

321 computational demand (from an average of 5640 minutes to 2020 minutes per assembly on a  
322 dual 8-core Intel IvyBridge 2.6GHz, 256GB 1866MHz memory, Table S4).

323

324 The analysis of local sequence assembly quality was inconclusive, showing inconsistent  
325 results across different methodologies (Table 2), suggesting neither approach was clearly  
326 superior to the other in this respect. However, detailed investigation of single nucleotide  
327 polymorphisms (SNPs) between ONT and PacBio-based assemblies for the reference isolates  
328 demonstrated two specific patterns of assembly differences. First, some positions (17 SNPs  
329 across the two reference isolates) appeared plausibly polymorphic in the original DNA  
330 sample and were called differently in different assembly runs (see Figure 2a). Secondly,  
331 positions within regions with extremely low Illumina coverage (see Figure 2b) could have led  
332 to assembly errors (25 SNPs across the two reference isolates), the PacBio assemblies being  
333 more affected (22 cases vs 3 for ONT).

334

335 The proportion of proteins with a length of <90% of their top UniProt hit was low (~2-4% c.f.  
336 3.7% for the RefSeq assembly of *E. coli* MG1655) and extremely consistent across  
337 ONT+Illumina and PacBio+Illumina assemblies (Figure S5), suggesting that indels were not  
338 a significant problem in the assemblies. There was very close agreement between methods  
339 (median discrepancy < 5 proteins), although there were a greater number of cases where more  
340 proteins were found in the ONT+Illumina assemblies (Figure S6). Proteins found uniquely in  
341 an assembly tended to be found on a contig that was fragmented in the comparison assembly  
342 (e.g. the third plasmid in the ONT-based assembly for RBHSTW-00167 was fragmented in  
343 the comparison PacBio-based assembly, and was the location of 11 proteins unique to the  
344 ONT-based assembly), highlighting that the degree of contig fragmentation in an assembly  
345 can affect conclusions about gene presence beyond just the inability to resolve genomic  
346 structures (Table S5, Figure S4).

347

348 Comparing *de novo* assemblies and reference genomes for the two reference strains (CFT073  
349 and MGH78578) we found that the hybrid assemblies from ONT and PacBio reads were  
350 more similar to each other (e.g. 18 SNPs and 0 indels for CFT073 and 24 SNPs and 13 indels  
351 for MGH78578) than to the available reference genome sequences (156-365 SNPs and 47-  
352 439 indels vs. the references, Table S6), possibly due to: (i) strain evolution in storage and  
353 sub-culture since the reference strains were sequenced; (ii) errors in the original reference  
354 sequences; and/or (iii) consistent errors in the hybrid assemblies.

355

356 Lastly, we investigated the effects of further ONT multiplexing by simulating datasets with 8  
357 and 12 barcodes respectively (see Methods). Halving the available reads (equivalent to 8  
358 barcodes) had no negative effect on the assemblies (Table S7). Using a third (equivalent to 12  
359 barcodes) slightly increased the fragmentation of the assemblies overall (one fewer  
360 completed assembly and nine additional non-circular contigs). However, these results were  
361 not uniform: two assemblies gained an extra circular contig (RBHSTW-00309 and  
362 RBHSTW-00340) with this downsampling.

363

### 364 **DNA preparation and sequencing costs**

365 Beyond considerations of assembly accuracy, an important and realistic consideration when  
366 choosing a sequencing approach is cost. While we do not attempt to calculate estimates that  
367 will apply across different labs and settings, we can report our consumables costs per isolate  
368 (i.e. exclusive of other potential costs, such as labour/infrastructure [laboratory and  
369 computational]) in case it is helpful for informing others. The cost of bacterial culture and  
370 DNA extraction was approximately £12 per isolate, resulting in sufficient DNA for all three  
371 sequencing methods to be performed in parallel on a single extract. Cost for Illumina library  
372 preparation and sequencing (see Methods) was ~£41 per isolate. ONT MinION sequencing



373 (library preparation and run) was performed by multiplexing 4 isolates per run, resulting in  
374 costs of approximately £130 per isolate; however, it is possible to multiplex up to 12 isolates  
375 per run at correspondingly lower coverage (13), resulting in costs of ~£44/isolate. At the time  
376 we performed these experiments (late 2017), the PacBio sequencing was done using one  
377 isolate per library per SMRTcell on the RSII system, with PacBio sequencing costs of more  
378 than £280 per isolate. However, at the time of manuscript preparation, microbial sequencing  
379 had been transferred to the higher throughput PacBio Sequel system, on which multiple  
380 isolates can be multiplexed per SMRTcell 1M. Assuming ownership of a Sequel system, the  
381 updated cost for PacBio sequencing, including DNA fragmentation, SMRTbell preparation,  
382 size selection on the BluePippin system (Sage Science) and sequencing, is £190 per isolate  
383 when multiplexing 8 isolates. If less coverage is needed or smaller genomes are to be  
384 examined, one could multiplex up to 16 isolates per SMRTcell 1M at a cost of £152 per  
385 isolate.

386  
387 To summarise, in the optimal scenario for each technology in our setting, our total predicted  
388 consumables costs range from £97-183 for generating an ONT+Illumina hybrid assembly  
389 (multiplexing 4 versus 12 isolates) to £205-255 for generating a PacBio+Illumina hybrid  
390 assembly on the PacBio Sequel system (multiplexing 8 versus 16 isolates). Costs using the  
391 PacBio RSII system (i.e. >£320) to generate PacBio+Illumina hybrid assemblies would be  
392 substantially higher than those for generating an ONT+Illumina hybrid assembly. We stress  
393 that these costs are estimates only, and specifically do not include infrastructural and staffing  
394 costs.

395

## 396 DISCUSSION

397 Combining short read Illumina sequencing with different long read sequencing technologies  
398 and using Unicycler, a publicly available and widely-used hybrid assembly tool, we found  
399 that ONT+Illumina hybrid assembly generally facilitates the complete assembly of complex  
400 bacterial genomes without additional manual steps. Our data thus support ONT+Illumina  
401 sequencing as a non-inferior bacterial genome hybrid assembly approach compared with  
402 PacBio+Illumina, leading to more complete assemblies, and to significantly lower costs per  
403 isolate if multiplexed.

404

405 We also investigated the impact of different long-read processing strategies on assembly  
406 quality and found that different strategies can result in more complete assemblies. We showed  
407 that quality-based filtration and correction of long reads can apparently paradoxically result  
408 in worse performance than just using unfiltered and uncorrected reads. There is no obvious  
409 explanation for this; although we speculate that preferential removal of long reads from hard-  
410 to-sequence regions might be a contributing factor, we have been unable to establish if this is  
411 the case. We propose a different strategy to reduce the computational burden of hybrid  
412 assembly without affecting the final outcome, namely randomly sub-sampling long reads  
413 down to a desired level of coverage. We demonstrated that this strategy generally results in  
414 better assemblies for ONT sequencing data.

415

416 We did however identify some recurrent patterns of local hybrid misassembly that could be  
417 systematically addressed in the future. One of these is the presence of polymorphisms in the  
418 DNA extract. These may represent genuine minor variants present in the isolate (although it  
419 is difficult to establish with certainty), but the salient fact here is that current bacterial  
420 assembly methods assume that no position is polymorphic which can lead to an imperfect  
421 representation of the genomic content where this is not the case. We advocate for the  
422 inclusion or awareness of polymorphisms within assembly polishing methods e.g. Pilon (29).

423

424 The other problem we identified is that regions with very low Illumina coverage tend to be  
425 enriched with small assembly errors. This problem could similarly be addressed in the future  
426 with hybrid assembly polishing methods, which would supplement Illumina-based polishing  
427 with long read-based polishing in regions with low Illumina coverage.

428  
429 There were several limitations to our study. Firstly, we included only two reference strains,  
430 and our analyses suggest that the “true” sequences for these had diverged from the publicly  
431 available reference sequences. This divergence could arise from multiple sources: true  
432 biological variation after years of storage and/or sub-culture (a known possibility that has  
433 been previously observed for bacterial reference strains e.g. in archived cultures of  
434 *Salmonella enterica* serovar Typhimurium LT2 (30)), errors in the original reference  
435 sequences (first published in 2002 for CFT073, 2007 for MGH78578), or possible errors in  
436 our hybrid assemblies. Thus, making comparisons for any given approach even in the case  
437 where a reference is available is difficult in the absence of a clear gold standard. Of note, we  
438 tried to minimize biological variability introduced in culture by sequencing the same DNA  
439 extract across different platforms. For 18 isolates the “true” underlying sequence was  
440 unknown, which is common for highly plastic Enterobacteriaceae genomes. There is no  
441 consensus on how best to evaluate assemblies and assembly quality when a reference is not  
442 available. We therefore used several approaches, and these were not always consistent with  
443 each other.

444  
445 Assemblies can sometimes be further improved after an initial evaluation using “manual  
446 completion” (see <https://github.com/rrwick/Unicycler/wiki/Tips-for-finishing-genomes>).  
447 However, we did not investigate manual completion for our hybrid assemblies because, in  
448 general, it is hard to replicate, has not been benchmarked and validated, is more easily biased,  
449 and is not feasible for processing large numbers of isolates. We did not identify any  
450 published, publicly available tools developed to specifically handle PacBio+Illumina hybrid  
451 assembly, although some research groups may have implemented and validated these in-  
452 house. Finally, we did not investigate the effect of different basecallers. The evolution of both  
453 technologies and post-sequencing processing of data generated by both ONT and PacBio  
454 platforms is rapid, and recent advances have been made e.g. in basecalling with the switch  
455 from Albacore to Guppy for ONT data. Our assumption is that such advances which improve  
456 read quality and basecalling will improve assembly quality, but we have not carried out  
457 specific comparisons.

458  
459 In conclusion, we have demonstrated that reference-grade, complete hybrid assemblies can be  
460 effectively generated for complex bacterial genomes including multiple plasmids using ONT  
461 platforms in combination with Illumina data. Given the average yields that can be generated  
462 with these devices, it should be feasible to comfortably multiplex eight Enterobacteriaceae  
463 isolates per ONT flowcell. At current listed cost prices, this effectively represents a cost of  
464 ~£100/hybrid assembly (all laboratory and sequencing consumables costs [includes Illumina  
465 and Nanopore]).

466

467

## 468 **AUTHOR STATEMENTS**

469

### 470 **Authors and contributors**

471 Conceptualisation: NdM, ASW, TEAP, DWC, NSt; Methodology: NdM, LPS, RW, NSt;  
472 Software: NdM, LPS, RW, AS, NSa, JS; Formal analysis: NdM, LPS, NSt; Investigation: AH,  
473 SG, MAb, ES; Resources: MA, DR, DWC, ASW, TEAP, SJH, NSt; Data curation: MAb, ES,  
474 NdM, LPS, NSt; Writing - original draft preparation: NdM, LPS, SG, ASW, NSt; Writing -

475 review and editing: All authors; Visualisation: NdM, LPS, NSt; Supervision: MA, DR, DWC,  
476 NSt; Project administration: SJH, MA, DR, NSt; Funding: MA, DR, DWC, NSt.

477

#### 478 **Conflicts of interest**

479 The authors have no conflicts of interest to declare.

480

#### 481 **Funding information**

482 This work was funded by the Antimicrobial Resistance Cross-council Initiative supported by  
483 the seven research councils [NE/N019989/1].

484

485 Crook, George, Peto, Sheppard, Walker are affiliated to the National Institute for Health  
486 Research Health Protection Research Unit (NIHR HPRU) in Healthcare Associated Infections  
487 and Antimicrobial Resistance at University of Oxford in partnership with Public Health  
488 England (PHE) [grant HPRU-2012-10041]. The views expressed are those of the author(s)  
489 and not necessarily those of the NHS, the NIHR, the Department of Health or Public Health  
490 England.

491

492 This work is supported by the NIHR Oxford Biomedical Research Centre.

493

#### 494 **Acknowledgements**

495 The REHAB consortium is represented by (bracketed individuals also included in main  
496 author list): (Abuoun M), (Anjum M), Bailey M, Brett H, Bowes M, Chau K, (Crook DW),  
497 (de Maio N), Duggett N, Gilson D, Gweon HS, (Hubbard A), (Hoosdally S), Kavanaugh J,  
498 Jones H, (Peto TEA), (Read DS), Sebra R, (Shaw LP), (Sheppard AE), Smith R,  
499 (Stubberfield E), (Swann J), (Walker AS), Woodford N.

500

501 We would like to acknowledge the support of Sebra R and Smith M in the Department of  
502 Genetics and Genomic Sciences at the Icahn School of Medical Sciences at Mt Sinai (New  
503 York, USA), who participated in the experimental design of the study and performed the  
504 long-read PacBio sequencing.

505

506 We would also like to acknowledge the support of Hartwell O and Platt J (Oxford Nanopore  
507 Technologies, Oxford, UK); however, there was no input from ONT in the design,  
508 experimental work, bioinformatics, or analyses performed in this study.

509

510

---

## 511 **ABBREVIATIONS**

512

513 ONT: Oxford Nanopore Technologies

514 PacBio: Pacific Biosciences

515 SNP: single nucleotide polymorphism

516 AMR: antimicrobial resistance

517

---

## 518 **REFERENCES**

519

- 520 1. Didelot X, Bowden R, Wilson DJ, Peto TEA, Crook DW. Transforming clinical  
521 microbiology with bacterial genome sequencing. *Nature Reviews. Genetics*. [Online]  
522 2012;13(9): 601–612. Available from: doi:10.1038/nrg3226

- 523 2. Bradley P, Gordon NC, Walker TM, Dunn L, Heys S, Huang B, et al. Rapid antibiotic-  
524 resistance predictions from genome sequence data for *Staphylococcus aureus* and  
525 *Mycobacterium tuberculosis*. *Nature Communications*. [Online] 2015;6: 10063.  
526 Available from: doi:10.1038/ncomms10063
- 527 3. Didelot X, Walker AS, Peto TE, Crook DW, Wilson DJ. Within-host evolution of  
528 bacterial pathogens. *Nature Reviews. Microbiology*. [Online] 2016;14(3): 150–162.  
529 Available from: doi:10.1038/nrmicro.2015.13
- 530 4. Qin J, Li R, Raes J, Arumugam M, Burgdorf KS, Manichanh C, et al. A human gut  
531 microbial gene catalogue established by metagenomic sequencing. *Nature*. [Online]  
532 2010;464(7285): 59–65. Available from: doi:10.1038/nature08821
- 533 5. George S, Pankhurst L, Hubbard A, Votintseva A, Stoesser N, Sheppard AE, et al.  
534 Resolving plasmid structures in Enterobacteriaceae using the MinION nanopore  
535 sequencer: assessment of MinION and MinION/Illumina hybrid data assembly  
536 approaches. *Microbial Genomics*. [Online] 2017;3(8): e000118. Available from:  
537 doi:10.1099/mgen.0.000118
- 538 6. Logan LK, Weinstein RA. The Epidemiology of Carbapenem-Resistant  
539 Enterobacteriaceae: The Impact and Evolution of a Global Menace. *The Journal of*  
540 *Infectious Diseases*. [Online] 2017;215(suppl\_1): S28–S36. Available from:  
541 doi:10.1093/infdis/jiw282
- 542 7. Koren S, Walenz BP, Berlin K, Miller JR, Bergman NH, Phillippy AM. Canu: scalable  
543 and accurate long-read assembly via adaptive k-mer weighting and repeat separation.  
544 *Genome Research*. [Online] 2017;27(5): 722–736. Available from:  
545 doi:10.1101/gr.215087.116
- 546 8. Loman NJ, Quick J, Simpson JT. A complete bacterial genome assembled de novo using  
547 only nanopore sequencing data. *Nature Methods*. [Online] 2015;12(8): 733–735.  
548 Available from: doi:10.1038/nmeth.3444
- 549 9. Rhoads A, Au KF. PacBio Sequencing and Its Applications. *Genomics, Proteomics &*  
550 *Bioinformatics*. [Online] 2015;13(5): 278–289. Available from:  
551 doi:10.1016/j.gpb.2015.08.002
- 552 10. Goodwin S, Gurtowski J, Ethe-Sayers S, Deshpande P, Schatz MC, McCombie WR.  
553 Oxford Nanopore sequencing, hybrid error correction, and de novo assembly of a  
554 eukaryotic genome. *Genome Research*. [Online] 2015;25(11): 1750–1756. Available  
555 from: doi:10.1101/gr.191395.115
- 556 11. Risse J, Thomson M, Patrick S, Blakely G, Koutsovoulos G, Blaxter M, et al. A single  
557 chromosome assembly of *Bacteroides fragilis* strain BE1 from Illumina and MinION  
558 nanopore sequencing data. *GigaScience*. [Online] 2015;4: 60. Available from:  
559 doi:10.1186/s13742-015-0101-6
- 560 12. Wick RR, Judd LM, Gorrie CL, Holt KE. Unicycler: Resolving bacterial genome  
561 assemblies from short and long sequencing reads. *PLoS computational biology*. [Online]  
562 2017;13(6): e1005595. Available from: doi:10.1371/journal.pcbi.1005595

- 563 13. Wick RR, Judd LM, Gorrie CL, Holt KE. Completing bacterial genome assemblies with  
564 multiplex MinION sequencing. *Microbial Genomics*. [Online] 2017;3(10): e000132.  
565 Available from: doi:10.1099/mgen.0.000132
- 566 14. Quick J, Loman NJ, Duraffour S, Simpson JT, Severi E, Cowley L, et al. Real-time,  
567 portable genome sequencing for Ebola surveillance. *Nature*. [Online] 2016;530(7589):  
568 228–232. Available from: doi:10.1038/nature16996
- 569 15. Carattoli A. Resistance plasmid families in Enterobacteriaceae. *Antimicrobial Agents  
570 and Chemotherapy*. [Online] 2009;53(6): 2227–2238. Available from:  
571 doi:10.1128/AAC.01707-08
- 572 16. Lamble S, Batty E, Attar M, Buck D, Bowden R, Lunter G, et al. Improved workflows  
573 for high throughput library preparation using the transposome-based Nextera system.  
574 *BMC biotechnology*. [Online] 2013;13: 104. Available from: doi:10.1186/1472-6750-13-  
575 104
- 576 17. De Coster W, D’Hert S, Schultz DT, Cruts M, Van Broeckhoven C. NanoPack:  
577 visualizing and processing long-read sequencing data. *Bioinformatics*. [Online]  
578 2018;34(15): 2666–2669. Available from: doi:10.1093/bioinformatics/bty149
- 579 18. Wick RR, Schultz MB, Zobel J, Holt KE. Bandage: interactive visualization of de novo  
580 genome assemblies. *Bioinformatics (Oxford, England)*. [Online] 2015;31(20): 3350–  
581 3352. Available from: doi:10.1093/bioinformatics/btv383
- 582 19. Thorvaldsdottir H, Robinson JT, Mesirov JP. Integrative Genomics Viewer (IGV): high-  
583 performance genomics data visualization and exploration. *Briefings in Bioinformatics*.  
584 [Online] 2013;14(2): 178–192. Available from: doi:10.1093/bib/bbs017
- 585 20. Watson M. A simple test for uncorrected insertions and deletions (indels) in bacterial  
586 genomes. 2018; Available from: [http://www.opiniomics.org/a-simple-test-for-  
587 uncorrected-insertions-and-deletions-indels-in-bacterial-genomes/](http://www.opiniomics.org/a-simple-test-for-uncorrected-insertions-and-deletions-indels-in-bacterial-genomes/)
- 588 21. Seemann T. Prokka: rapid prokaryotic genome annotation. *Bioinformatics (Oxford,  
589 England)*. [Online] 2014;30(14): 2068–9. Available from:  
590 doi:10.1093/bioinformatics/btu153
- 591 22. *Fast and sensitive protein alignment using DIAMOND | Nature Methods*. [Online]  
592 Available from: <https://www.nature.com/articles/nmeth.3176> [Accessed: 24th January  
593 2019]
- 594 23. Page AJ, Cummins CA, Hunt M, Wong VK, Reuter S, Holden MTG, et al. Roary: Rapid  
595 large-scale prokaryote pan genome analysis. *Bioinformatics*. [Online] 2015;31(22):  
596 3691–3693. Available from: doi:10.1093/bioinformatics/btv421
- 597 24. Clark SC, Egan R, Frazier PI, Wang Z. ALE: a generic assembly likelihood evaluation  
598 framework for assessing the accuracy of genome and metagenome assemblies.  
599 *Bioinformatics (Oxford, England)*. [Online] 2013;29(4): 435–443. Available from:  
600 doi:10.1093/bioinformatics/bts723
- 601 25. Langmead B, Salzberg SL. Fast gapped-read alignment with Bowtie 2. *Nature Methods*.  
602 [Online] 2012;9(4): 357–359. Available from: doi:10.1038/nmeth.1923

- 603 26. Kurtz S, Phillippy A, Delcher AL, Smoot M, Shumway M, Antonescu C, et al. Versatile  
604 and open software for comparing large genomes. *Genome Biology*. [Online] 2004;5(2):  
605 R12. Available from: doi:10.1186/gb-2004-5-2-r12
- 606 27. Hunt M, Kikuchi T, Sanders M, Newbold C, Berriman M, Otto TD. REAPR: a universal  
607 tool for genome assembly evaluation. *Genome Biology*. [Online] 2013;14(5): R47.  
608 Available from: doi:10.1186/gb-2013-14-5-r47
- 609 28. Li H. Minimap2: pairwise alignment for nucleotide sequences. *Bioinformatics*. [Online]  
610 2018;34(18): 3094–3100. Available from: doi:10.1093/bioinformatics/bty191
- 611 29. Walker BJ, Abeel T, Shea T, Priest M, Abouelliel A, Sakthikumar S, et al. Pilon: an  
612 integrated tool for comprehensive microbial variant detection and genome assembly  
613 improvement. *PloS One*. [Online] 2014;9(11): e112963. Available from:  
614 doi:10.1371/journal.pone.0112963
- 615 30. Rabsch W, Helm RA, Eisenstark A. Diversity of phage types among archived cultures of  
616 the Demerec collection of *Salmonella enterica* serovar Typhimurium strains. *Applied*  
617 *and Environmental Microbiology*. 2004;70(2): 664–669.
- 618  
619
-

620 **FIGURES AND TABLES**

621 **Table 1. Summary of all assemblies in terms of circularised contigs.** Different rows refer to different isolates. "*n* of *m*" means that *n* contigs  
 622 were circular in the assembly out of *m* total contigs. When *n* and *m* are identical, it means that the assembly was considered complete, and these  
 623 cases are shaded in green. "Basic", "Corrected", "Filtered" and "Subsampled" refer to the strategies of long read preparation (see Methods).  
 624 "NA" refers to cases where the assembly pipeline repeatedly failed. The true number of circular structures was estimated by inspection.

| Isolate              | ONT (MinION) |           |          |            | PacBio (RSII System) |           |          |            | True circular structures (estimated) |
|----------------------|--------------|-----------|----------|------------|----------------------|-----------|----------|------------|--------------------------------------|
|                      | Basic        | Corrected | Filtered | Subsampled | Basic                | Corrected | Filtered | Subsampled |                                      |
| CFT073 (reference)   | 1 of 1       | 1 of 1    | 0 of 9   | 1 of 1     | 0 of 9               | 0 of 9    | 0 of 9   | 0 of 9     | 1                                    |
| MGH78578 (reference) | 6 of 6       | 4 of 7    | NA       | 6 of 6     | 4 of 7               | 2 of 22   | 2 of 22  | 2 of 22    | 6                                    |
| RBHSTW-00029         | 3 of 9       | 3 of 9    | 3 of 9   | 3 of 9     | 3 of 9               | 3 of 9    | 3 of 9   | 3 of 9     | 4                                    |
| RBHSTW-00053         | 6 of 6       | 6 of 6    | 6 of 6   | 6 of 6     | 6 of 6               | 6 of 6    | 6 of 6   | 6 of 6     | 6                                    |
| RBHSTW-00059         | 5 of 5       | 5 of 5    | 5 of 5   | 5 of 5     | 5 of 5               | 5 of 5    | 5 of 5   | 5 of 5     | 5                                    |
| RBHSTW-00122         | 4 of 4       | 4 of 4    | 4 of 4   | 4 of 4     | 4 of 4               | 4 of 4    | 4 of 4   | 4 of 4     | 4                                    |
| RBHSTW-00123         | 7 of 7       | NA        | 7 of 7   | 7 of 7     | 5 of 8               | 4 of 18   | 4 of 18  | 4 of 18    | 7                                    |
| RBHSTW-00127         | 5 of 5       | 5 of 5    | 5 of 5   | 5 of 5     | 5 of 5               | 5 of 5    | 5 of 5   | 5 of 5     | 5                                    |
| RBHSTW-00128         | 4 of 4       | 4 of 4    | 4 of 4   | 4 of 4     | 4 of 4               | 3 of 6    | 3 of 6   | 3 of 6     | 4                                    |
| RBHSTW-00131         | 4 of 4       | 2 of 7    | 4 of 4   | 4 of 4     | 3 of 15              | 4 of 5    | 3 of 15  | 2 of 15    | 4                                    |
| RBHSTW-00142         | 7 of 7       | 5 of 25   | 7 of 7   | 7 of 7     | 4 of 24              | 4 of 58   | 4 of 24  | 4 of 27    | 7                                    |
| RBHSTW-00167         | 9 of 9       | 5 of 15   | 10 of 10 | 9 of 9     | 4 of 34              | 3 of 60   | 3 of 60  | 3 of 60    | 9                                    |
| RBHSTW-00189         | 6 of 6       | 6 of 6    | 5 of 6   | 6 of 6     | 5 of 29              | 5 of 28   | 5 of 29  | 5 of 30    | 6                                    |
| RBHSTW-00277         | 2 of 2       | 2 of 2    | 1 of 8   | 2 of 2     | 1 of 8               | 1 of 8    | 1 of 8   | 1 of 8     | 2                                    |
| RBHSTW-00309         | 4 of 5       | 5 of 5    | 5 of 5   | 4 of 5     | 5 of 5               | 4 of 5    | 5 of 5   | 5 of 5     | 5                                    |
| RBHSTW-00340         | 3 of 11      | 3 of 11   | 4 of 4   | 4 of 4     | 2 of 25              | 2 of 25   | 2 of 24  | 2 of 25    | 4                                    |
| RBHSTW-00350         | 2 of 2       | 2 of 2    | 2 of 3   | 2 of 2     | 2 of 2               | 2 of 2    | 2 of 2   | 2 of 2     | 2                                    |
| RHB10-C07            | 1 of 1       | 1 of 1    | 1 of 1   | 1 of 1     | 1 of 1               | 1 of 1    | 1 of 17  | 1 of 1     | 1                                    |
| RHB11-C04            | 3 of 3       | 3 of 3    | 3 of 3   | 3 of 3     | 3 of 3               | 3 of 3    | 3 of 3   | 3 of 3     | 3                                    |
| RHB14-C01            | 1 of 12      | 1 of 12   | 1 of 15  | 1 of 12    | 1 of 15              | 1 of 15   | 1 of 15  | 1 of 15    | 2                                    |
| Total contigs        | 109          | 130       | 115      | 102        | 218                  | 294       | 276      | 265        |                                      |

|                                                                                                                                     | ONT (MinION) |          |          |          | PacBio (RSII System) |          |          |          |
|-------------------------------------------------------------------------------------------------------------------------------------|--------------|----------|----------|----------|----------------------|----------|----------|----------|
| Total circularised contigs (% over total estimated circular structures from Bandage: n=87 for all isolates)                         | 83 (95%)     | 67 (84%) | 77 (95%) | 84 (97%) | 67 (77%)             | 62 (71%) | 62 (71%) | 61 (70%) |
| Total circularised contigs for reference strains (i.e. structures known, total n=1 [ <i>E. coli</i> ] + 6 [ <i>K. pneumoniae</i> ]) | 7 (100%)     | 5 (71%)  | 0 (0%)   | 7 (100%) | 5 (71%)              | 2 (29%)  | 2 (29%)  | 2 (29%)  |
| Total isolates with all contigs circularised (% isolates)                                                                           | 16 (80%)     | 12 (60%) | 13 (65%) | 17 (85%) | 9 (45%)              | 7 (35%)  | 7 (35%)  | 8 (40%)  |



625 **Table 2. Comparison between PacBio and ONT-based hybrid assemblies.** Comparisons are shown using ALE, DNAdiff and REAPR (see  
 626 Methods). Different rows represent different isolates. All entries representing a better score for the PacBio assembly are shaded in red, those  
 627 showing a better score for ONT are shaded in blue. "ALE score" is the assembly likelihood difference (calculated by ALE from the mapping of  
 628 Illumina reads) between PacBio and ONT assemblies. "Unmapped reads" refers to the number of Illumina reads that ALE did not map to the  
 629 corresponding assembly. "REAPR errors" refers to the assembly errors found by REAPR by mapping Illumina reads to the corresponding  
 630 assembly. For each isolate, one ONT and one PacBio-based assembly with the best completion (i.e. number of circularised contigs) were chosen  
 631 for comparison. DNAdiff results show the median (range) results from comparing all assemblies for an isolate across read preparation strategies  
 632 i.e. 4x4=16 comparisons for each isolate. "GSNPs" and "GIndels" refer to the high-confidence SNPs and indels found between ONT and PacBio  
 633 assemblies.

| Isolate                                       | ALE score | PacBio unmapped reads (% total) | ONT unmapped reads (% total) | PacBio REAPR errors | ONT REAPR errors | DNAdiff GSNPs | DNAdiff GIndels |
|-----------------------------------------------|-----------|---------------------------------|------------------------------|---------------------|------------------|---------------|-----------------|
| CFT073<br>(reference <i>E. coli</i> )         | -17928    | 29246 (0.89%)                   | 29240 (0.89%)                | 5                   | 5                | 1 (0-1)       | 0 (0-0)         |
| MGH78578<br>(reference <i>K. pneumoniae</i> ) | -1532602  | 41793 (1.31%)                   | 38371 (1.21%)                | 8                   | 7                | 6 (1-7)       | 0 (0-1)         |
| RBHSTW-00029                                  | 207465    | 50056 (1.85%)                   | 49876 (1.84%)                | 3                   | 3                | 0 (0-0)       | 0 (0-0)         |
| RBHSTW-00053                                  | 4727      | 50860 (1.62%)                   | 50861 (1.62%)                | 12                  | 11               | 1.5 (0-4)     | 0 (0-0)         |
| RBHSTW-00059                                  | -143627   | 37357 (1.04%)                   | 36251 (1.01%)                | 15                  | 14               | 0 (0-0)       | 0 (0-0)         |
| RBHSTW-00122                                  | 0         | 24355 (1.18%)                   | 24355 (1.18%)                | 6                   | 7                | 0 (0-0)       | 0 (0-0)         |
| RBHSTW-00123                                  | -1963188  | 56224 (1.68%)                   | 57074 (1.70%)                | 17                  | 21               | 4 (1-6)       | 4.5 (2-6)       |
| RBHSTW-00127                                  | -1145     | 34206 (0.98%)                   | 34206 (0.98%)                | 16                  | 16               | 0 (0-0)       | 0 (0-0)         |
| RBHSTW-00128                                  | 3114      | 31526 (1.06%)                   | 31507 (1.05%)                | 6                   | 8                | 2 (1-2)       | 2 (1-4)         |
| RBHSTW-00131                                  | 399368    | 25880 (0.88%)                   | 26271 (0.89%)                | 24                  | 28               | 3 (1-7)       | 1 (1-3)         |
| RBHSTW-00142                                  | -790773   | 34684 (1.23%)                   | 32590 (1.16%)                | 12                  | 12               | 3 (1-11)      | 0 (0-1)         |
| RBHSTW-00167                                  | 4083063   | 34510 (1.13%)                   | 76805 (2.52%)                | 24                  | 33               | 21 (18-47)    | 1.5 (0-4)       |
| RBHSTW-00189                                  | -158523   | 37378 (1.25%)                   | 37418 (1.25%)                | 9                   | 12               | 11.5 (7-21)   | 1 (0-2)         |
| RBHSTW-00277                                  | 18417     | 33677 (0.99%)                   | 33685 (0.99%)                | 16                  | 16               | 2 (0-2)       | 0 (0-0)         |
| RBHSTW-00309                                  | -518811   | 30704 (0.88%)                   | 30327 (0.87%)                | 17                  | 36               | 2 (0-11)      | 44.5 (0-86)     |
| RBHSTW-00340                                  | -906675   | 30802 (0.87%)                   | 29860 (0.84%)                | 11                  | 10               | 2 (0-4)       | 0 (0-1)         |
| RBHSTW-00350                                  | 21188     | 28907 (0.79%)                   | 28907 (0.79%)                | 12                  | 13               | 2 (2-4)       | 5 (0-8)         |
| RHB10-C07                                     | -23295    | 27779 (0.90%)                   | 27777 (0.90%)                | 22                  | 21               | 5 (0-17)      | 0.5 (0-1)       |
| RHB11-C04                                     | 12774     | 24879 (0.86%)                   | 24881 (0.86%)                | 25                  | 25               | 2 (0-6)       | 0 (0-0)         |
| RHB14-C01                                     | 172712    | 30478 (0.95%)                   | 30576 (0.95%)                | 13                  | 12               | 3 (0-3)       | 0 (0-0)         |



650 **Figure 2. Examples of mismatches identified between the ONT-based and the PacBio-**  
 651 **based assemblies for the two reference strains (*E. coli* CFT073 and *K. pneumoniae***  
 652 **MGH78578).** Each sub-figure is an Interactive Genome Viewer (IGV) (v2.4.3) [15] view of  
 653 part of the PacBio-based assembly, centered around a PacBio-ONT SNP, with all reads from  
 654 the same isolate mapped to it. We performed this analysis for all SNPs in isolates MGH78578  
 655 and CFT073, and report examples for the two most typical patterns observed. a) SNP from  
 656 MGH78578 with very low Illumina coverage, but normal PacBio and ONT coverage. Most  
 657 of the Illumina reads have a different base than the one in the PacBio-assembled reference  
 658 (the red T's), suggesting perhaps an error in the PacBio assembly. A similar pattern is  
 659 observed in 14 SNPs in CFT073 (with 12 due to error in the PacBio assembly), and 11 SNPs  
 660 in MGH78578 (with 10 due to error in the PacBio assembly). b) SNP from MGH78578 with  
 661 normal Illumina coverage; Illumina reads support both bases with similar proportions,  
 662 suggesting that this could be a polymorphic site within the original DNA sample. This pattern  
 663 was observed for 4 SNPs in CFT073 and for 13 SNPs in MGH78578.

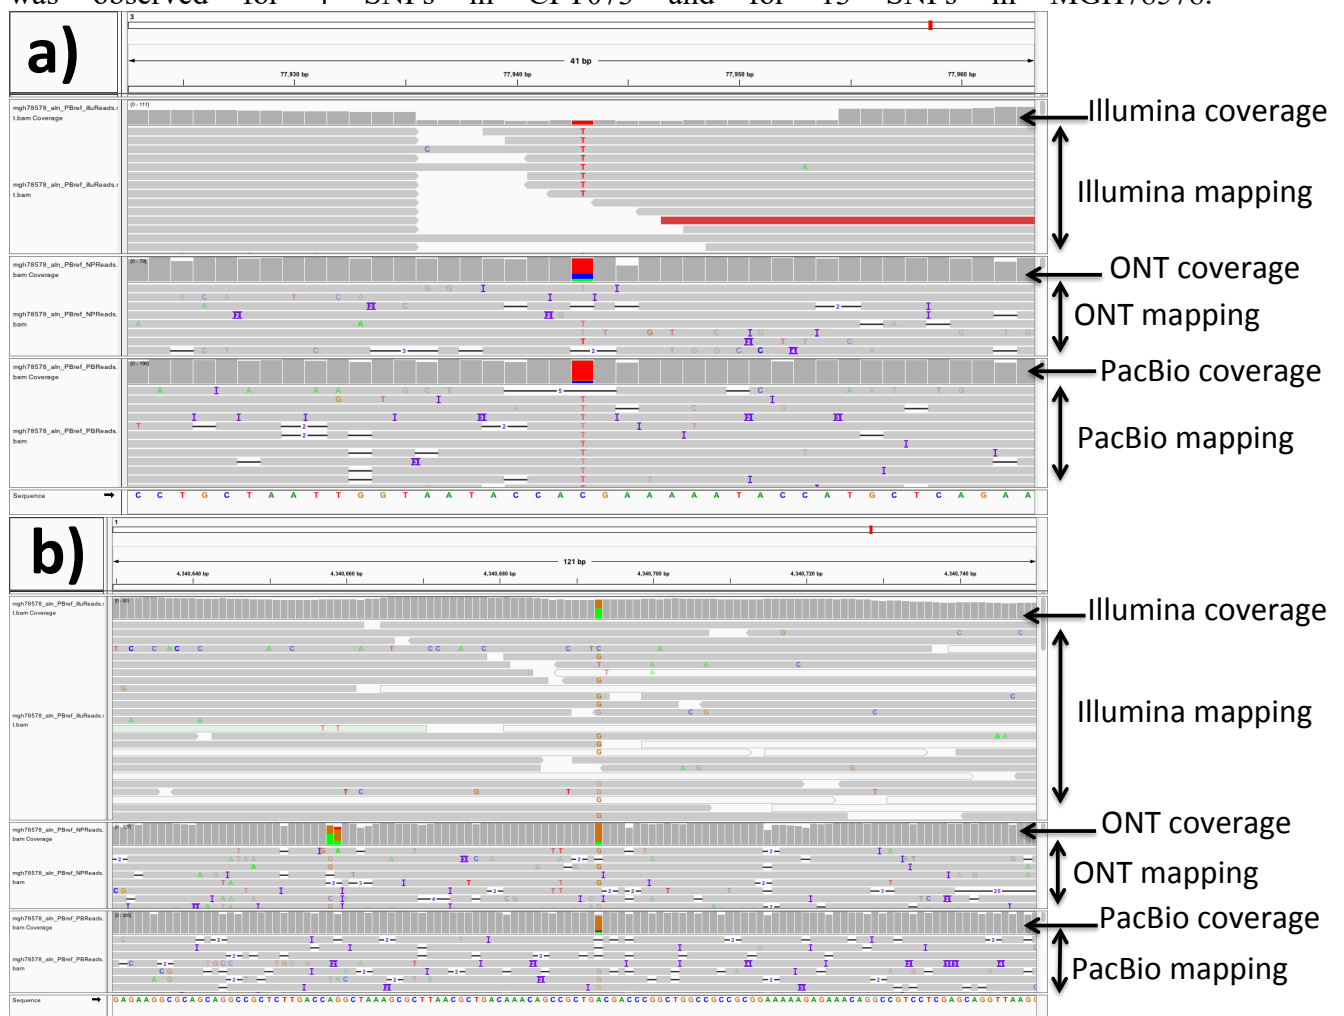

664

## 665 SUPPLEMENTARY FIGURES AND TABLES

666 **Figure S1. Read counts and read length distributions for ONT and PacBio outputs.**

667

668 **Figure S2. Summary of read-to-assembly alignments.** All assemblies considered were  
669 obtained using all reads of the given type. Reads are classified as "good" if they have at least  
670 one mapping covering 97% of the read. They are classified as a putative "chimera" if they  
671 have multiple inconsistent alignments with at least 10% of read length and 70% identity.  
672 Complete statistics from minimap2/Filtlong outputs are in Table S2.

673

674 **Figure S3. Mean percent identities and identity N50 values of ONT/PacBio reads**  
675 **aligned to the hybrid assemblies.** We considered the average identity for each base, and if  
676 there were multiple alignments at a base, we used the one with the best score. We aligned  
677 PacBio reads to the hybrid assembly obtained from all PacBio reads. We aligned ONT reads  
678 to the hybrid assembly obtained from all ONT reads. Identity N50 represents the percent  
679 identity for which half of the total bases are in reads with this identity value or higher.  
680 Complete statistics are in Table S3.

681

682 **Figure S4. Bandage plots for hybrid assemblies.** Each square represents one genome  
683 assembly. Shown are the ONT+Illumina (left) and PacBio+Illumina (right) assemblies for  
684 each isolate (4 columns of 5 isolates). All assembly plots are for the globally optimal long  
685 read preparation strategy for each sequencing approach i.e. "Subsampled" for ONT+Illumina  
686 and "Basic" for PacBio+Illumina (see Methods). Sequential colours for plasmids are for  
687 identical structures within isolates, but not between.

688

689 **Figure S5. Percentage of proteins with a length <90% of top UniProt hit.** Proteins in  
690 assemblies were annotated with Prokka then blasted with DIAMOND against the full UniProt  
691 database (see Methods). The proportion of proteins with a length <90% of their top UniProt  
692 hit gives a simple test for artificially shortened proteins due to indel errors in assembly. The  
693 black dashed line indicates the percentage in an existing high-quality reference genome for *E.*  
694 *coli* MG1655 (157 proteins out of 4240; RefSeq GCF\_000005845.2). Absolute numbers were  
695 all <250; shown here is the value as a percentage of the maximum number of proteins  
696 observed in any assembly for the sample to allow comparison between different genome  
697 sizes.

698

699 **Figure S6. Comparison of discrepancy in total Prokka annotated regions across all**  
700 **assemblies.** The discrepancy is the number of annotated regions in the ONT+Illumina  
701 assembly minus the number of annotated regions in the PacBio+Illumina assembly. All  
702 4x4=16 comparisons of read preparation strategies are shown.

703

704 **Table S1. Summary of sequenced isolates, DNA inputs and raw sequencing metrics.**  
705 Statistics in this table refer to raw (i.e. unfiltered) sequencing data. ONT read statistics were  
706 generated with nanostat (v0.22).

707

708 **Table S2. Classification of long reads from PacBio and ONT.** "PB" indicates PacBio.  
709 "PB2ONT" represents PacBio reads mapped to the ONT hybrid assembly, and so on. All  
710 assemblies considered were obtained using all reads of the given type. We show the number  
711 of reads falling in different categories according to how they map to the assemblies. Reads  
712 are classified as "Good" if they have at least one mapping covering 97% of the read. They are  
713 classified as a putative "chimera" if they have multiple inconsistent alignments with at least  
714 10% of read length and 70% identity.

715

716 **Table S3. Properties of long reads from PacBio and ONT.** “PB” indicates PacBio. Reads  
717 were mapped to the assemblies using minimap2 to determine identity. We considered the  
718 average identity for each base, and if there were multiple alignments at a base, we used the  
719 one with the best score. We aligned PacBio reads to the hybrid assembly obtained from all  
720 PacBio reads. We aligned ONT reads to the hybrid assembly obtained from all ONT reads.  
721 N50 represents the length or identity for which half of the read bases are in reads of at least  
722 such length or identity.

723  
724 **Table S4. Assembly runtimes in minutes.** All assemblies were run with dual 8-core Intel  
725 IvyBridge 2.6GHz, 256GB 1866MHz memory. Times include running times for Canu  
726 correction and read filtering.

727  
728 **Table S5. Location and counts of proteins found uniquely in (a) ONT-based or (b)  
729 PacBio-based assembly for each sample.** Shown here is the comparison between assemblies  
730 using the globally optimal long read preparation strategy for each sequencing approach i.e.  
731 “Subsampled” for ONT+Illumina and “Basic” for PacBio+Illumina (as in Figure S4).  
732 Proteins from assemblies for each sample were clustered using Roary after annotation with  
733 Prokka. Contig order indicates size order in the relevant assembly (see Figure S4). The start  
734 of the greyed-out squares indicates the total number of contigs in the assembly.

735  
736 **Table S6. Results of DNAdiff comparison between reference genomes (*E. coli* CFT073  
737 and *K. pneumoniae* MGH78578 genomes) and hybrid assemblies with either PacBio or  
738 ONT.** Each row corresponds to a comparison, either between the reference and PacBio  
739 assembly, or between the reference and the ONT assembly, or between the two *de novo*  
740 hybrid assemblies. “Length difference” means the difference in total length of the two  
741 genomes. “Aligned bases (ref)” represents the number of bases from the first comparison  
742 genome that are aligned with the other genome in the comparison. In each comparison the  
743 ONT assembly is the one obtained using half of the long reads, while the PacBio assembly is  
744 obtained following long read correction.

745  
746 **Table S7. Simulating the effect of increased level of ONT multiplexing on hybrid  
747 assembly.** Values represent numbers of contigs, either circular contigs, or any contig. Three  
748 simulations are presented, either with all reads, with half the reads, or with one third of the  
749 reads.
